# Supplementary material for: Combining in silico and in vitro approaches to identify endogenous hypoglycemic peptides from human milk
Source: Royal Society of Chemistry journal article supplement (doi:10.1039/d1fo03537a), 2022-01-01
Supplement: d1fo03537a1.pdf [file d1fo03537a1.pdf]

1

## **Supplementary Material**

2

3 **Combining *in silico* and *in vitro* approaches to identify endogenous**  
4 **hypoglycemic peptides from human milk**

5

6 **Ting Xiao<sup>a</sup>, Junpeng Zeng<sup>a</sup>, Leyun Qiu<sup>a</sup>, Ruiyan Wang<sup>a</sup>, Nan Li<sup>a</sup>, Zeyuan Deng<sup>a,b\*</sup>,**  
7 **and Liufeng Zheng<sup>a\*</sup>**

8 *<sup>a</sup> State Key Laboratory of Food Science and Technology, Nanchang University,*  
9 *Nanchang 330047, P. R. China*

10 *<sup>b</sup> Institute for Advanced Study, Nanchang University, Nanchang 330031, P. R. China*

11

12 **\*Correspondence to:**

13 Liufeng Zheng. E-mail address: zhenglf2018@ncu.edu.cn;

14 Zeyuan Deng. E-mail address: dengzy@ncu.edu.cn

15

16

17 **Figure captions**

18 **Fig. 1S. Total ion chromatography and MS/MS chromatograms of PVTQPL**  
19 **standard in positive ESI mode.**

20

21 **Fig. 2S. Establishment and validation of the *in vitro* uptake model of Caco-2 cells.**

22 (A) Determination of monolayer cell integrity by the TEER value. (B) Validation of  
23 cell differentiation characteristics by the ALP activity ratio in AP and BL.

24

25

26

27

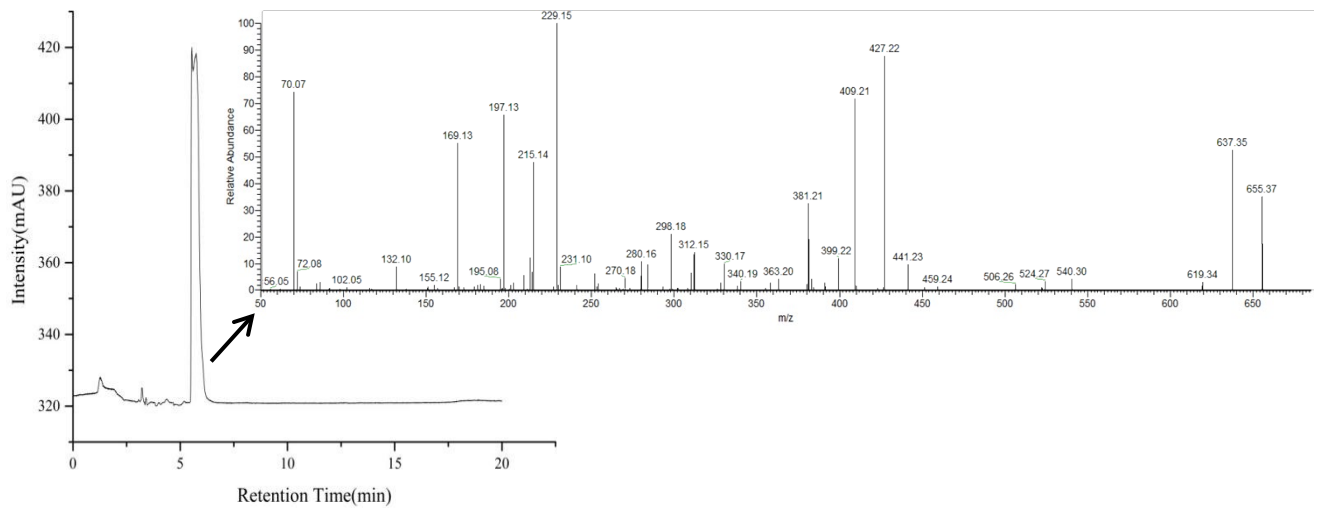

28

29

**Fig. 1S**

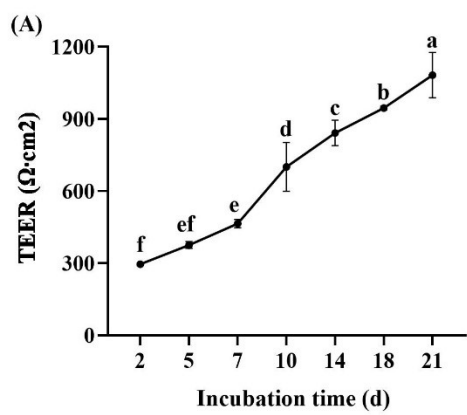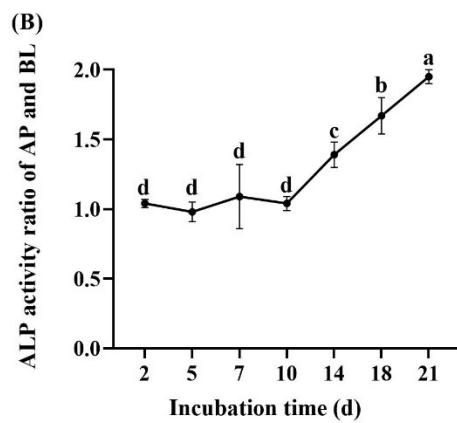

30

31

Fig. 2S

**Table S1.** List of 762 endogenous peptides obtained from the published peptidomics of human milk

| <b>Sequence</b>                             | <b>Protein names</b> | <b>Molecular weight (kDa)</b> | <b>Ref.</b> | <b>Peptide Ranker score</b> |
|---------------------------------------------|----------------------|-------------------------------|-------------|-----------------------------|
| AAHLPAEFTPAVHASLDKFLASVSTVL                 | HBA_HUMAN            | 2.80                          | 17          | 0.087                       |
| ADGSRASVDSGSSEEQGGSSR                       | PIGR_HUMAN           | 2.03                          | 17          | 0.493                       |
| ADTLHSKLIPTQPSQGAP                          | BT1A1_HUMAN          | 1.87                          | 17, 18      | 0.164                       |
| ADTRDQADGSRASVDSGSSEEQGGSSRA                | PIGR_HUMAN           | 2.79                          | 16          | 0.327                       |
| AEEKAVADTRDQADGSR                           | PIGR_HUMAN           | 1.82                          | 23          | 0.079                       |
| AEEKAVADTRDQADGSRASVDSGSSEEQGGSS            | PIGR_HUMAN           | 3.19                          | 16          | 0.097                       |
| AIPVAQDLNAPSDWDSRGKDS                       | OSTP_HUMAN           | 2.25                          | 17          | 0.213                       |
| AIPVAQDLNAPSDWDSRGKDSYETSQLDDQSAETHSHKQSRL  | OSTP_HUMAN           | 4.69                          | 16          | 0.248                       |
| AIPVAQDLNAPSDWDSRGKDSYETSQLDDQSAETHSHKQSRLY | OSTP_HUMAN           | 4.85                          | 16, 17      | 0.289                       |
| AIQDPRLF                                    | PIGR_HUMAN           | 0.96                          | 21          | 0.835                       |
| AIQDPRLFAEEKAVADTR                          | PIGR_HUMAN           | 2.04                          | 16, 17      | 0.393                       |

---

|                                                     |             |      |            |       |
|-----------------------------------------------------|-------------|------|------------|-------|
| AIQDPRLFAEEKAVADTRDQADGS                            | PIGR_HUMAN  | 2.61 | 16, 17, 18 | 0.194 |
| AIQDPRLFAEEKAVADTRDQADGSR                           | PIGR_HUMAN  | 2.76 | 16, 17, 18 | 0.305 |
| AIQDPRLFAEEKAVADTRDQADGSRASVDSGSSEEQGGSSRA          | PIGR_HUMAN  | 4.36 | 17, 18     | 0.077 |
| AIQDPRLFAEEKAVADTRDQADGSRASVDSGSSEEQGGSSRALVSTLVPLG | PIGR_HUMAN  | 5.24 | 17         | 0.275 |
| AKDTVYTKGR                                          | CASB_HUMAN  | 1.14 | 17         | 0.192 |
| AKDTVYTKGRVMPVLKSPTIPFFDPQIPK                       | CASB_HUMAN  | 3.28 | 16, 17     | 0.064 |
| AKLGAVYTEGGFVEGVNKKLGLLGDSVDIFK                     | CEL_HUMAN   | 3.23 | 17         | 0.049 |
| ALLNQELLLNPTHQ                                      | CASB_HUMAN  | 1.72 | 17         | 0.192 |
| ALLNQELLLNPTHQIYPVTQ                                | CASB_HUMAN  | 2.42 | 17         | 0.057 |
| ALLNQELLLNPTHQIYPVTQPLAPVHNPISV                     | CASB_HUMAN  | 3.55 | 17, 22     | 0.132 |
| ALPIQKLEPQIA                                        | PLIN2_HUMAN | 1.44 | 17, 18     | 0.269 |
| ALPPQPLWSVPQPK                                      | CASB_HUMAN  | 1.56 | 22         | 0.792 |
| ALPPQPLWSVPQPKVLPQPQVVPYPQ                          | CASB_HUMAN  | 3.02 | 17, 18     | 0.211 |
| ALPPQPLWSVPQPKVLPQPQVVPYPQRAVPVQA                   | CASB_HUMAN  | 3.74 | 16, 17, 18 | 0.165 |

---

---

|                               |             |      |            |       |
|-------------------------------|-------------|------|------------|-------|
| APRDADTLHSKLIPTQPSQGAP        | BT1A1_HUMAN | 2.31 | 17, 18     | 0.224 |
| APVHNPISV                     | CASB_HUMAN  | 0.94 | 19         | 0.366 |
| AQPAVVLPVPQPE                 | CASB_HUMAN  | 1.35 | 17, 18     | 0.270 |
| AQPAVVLPVPQPEIM               | CASB_HUMAN  | 1.59 | 17, 18     | 0.474 |
| AQPAVVLPVPQPEIMEVPK           | CASB_HUMAN  | 2.05 | 16, 17     | 0.414 |
| AQPAVVLPVPQPEIMEVPKAK         | CASB_HUMAN  | 2.25 | 17         | 0.099 |
| AQPAVVLPVPQPEIMEVPKAKDTV      | CASB_HUMAN  | 2.56 | 17         | 0.047 |
| AQPAVVLPVPQPEIMEVPKAKDTVY     | CASB_HUMAN  | 2.73 | 16, 17, 18 | 0.063 |
| AQPAVVLPVPQPEIMEVPKAKDTVYIT   | CASB_HUMAN  | 2.83 | 16, 17, 18 | 0.051 |
| AQPAVVLPVPQPEIMEVPKAKDTVYTK   | CASB_HUMAN  | 2.95 | 17, 18     | 0.054 |
| AQPAVVLPVPQPEIMEVPKAKDTVYTKG  | CASB_HUMAN  | 3.01 | 17         | 0.053 |
| AQPAVVLPVPQPEIMEVPKAKDTVYTKGR | CASB_HUMAN  | 3.17 | 17, 18     | 0.102 |
| ASKLGGIPDALPTVAAPRPVCQRCGQPL  | PDD2L_HUMAN | 2.82 | 17         | 0.746 |
| ASQLMGENRTMTIHNGMFFST         | FBC_HUMAN   | 2.38 | 19         | 0.018 |

---

---

|                                    |             |      |                |       |
|------------------------------------|-------------|------|----------------|-------|
| ASVAVDPQPSVVT                      | PLIN2_HUMAN | 1.27 | 16             | 0.180 |
| ASVAVDPQPSVVTR                     | PLIN2_HUMAN | 1.43 | 16             | 0.214 |
| ASVAVDPQPSVVTRVVNLPLVS             | PLIN2_HUMAN | 2.25 | 16             | 0.078 |
| ASVDSGSSEEQGGSSRALVSTLVPLG         | PIGR_HUMAN  | 2.50 | 17, 18         | 0.756 |
| ATSSLCSVTNTSMMTSE                  | ASSG_HUMAN  | 1.75 | 19             | 0.162 |
| AVADTRDQADG                        | PIGR_HUMAN  | 1.12 | 17             | 0.094 |
| AVADTRDQADGS                       | PIGR_HUMAN  | 1.21 | 17, 18         | 0.071 |
| AVADTRDQADGSRASVDSG                | PIGR_HUMAN  | 1.88 | 16, 23         | 0.082 |
| AVADTRDQADGSRASVDSGSSEEQGGSS       | PIGR_HUMAN  | 2.73 | 16, 17, 18, 23 | 0.204 |
| AVADTRDQADGSRASVDSGSSEEQGGSSR      | PIGR_HUMAN  | 2.89 | 17, 23         | 0.188 |
| AVADTRDQADGSRASVDSGSSEEQGGSSRA     | PIGR_HUMAN  | 2.96 | 16, 17, 18, 23 | 0.163 |
| AVADTRDQADGSRASVDSGSSEEQGGSSRAL    | PIGR_HUMAN  | 3.07 | 16             | 0.172 |
| AVADTRDQADGSRASVDSGSSEEQGGSSRALV   | PIGR_HUMAN  | 3.17 | 16             | 0.127 |
| AVADTRDQADGSRASVDSGSSEEQGGSSRALVST | PIGR_HUMAN  | 3.36 | 16, 17, 18, 23 | 0.105 |

---



---

|                                           |             |      |            |       |
|-------------------------------------------|-------------|------|------------|-------|
| AVADTRDQADGSRASVDSGSSEEQGGSSRALVSTL       | PIGR_HUMAN  | 3.47 | 16, 17     | 0.111 |
| AVADTRDQADGSRASVDSGSSEEQGGSSRALVSTLV      | PIGR_HUMAN  | 3.57 | 17, 18     | 0.120 |
| AVADTRDQADGSRASVDSGSSEEQGGSSRALVSTLVP     | PIGR_HUMAN  | 3.67 | 16, 17, 18 | 0.208 |
| AVADTRDQADGSRASVDSGSSEEQGGSSRALVSTLVPL    | PIGR_HUMAN  | 3.78 | 17, 18     | 0.446 |
| AVADTRDQADGSRASVDSGSSEEQGGSSRALVSTLVPLG   | PIGR_HUMAN  | 3.84 | 17, 18     | 0.400 |
| AVADTRDQADGSRASVDSGSSEEQGGSSRALVSTLVPLGLV | PIGR_HUMAN  | 4.05 | 17, 18     | 0.469 |
| AVPVQALLLNQ                               | CASB_HUMAN  | 1.17 | 19         | 0.238 |
| AVPVQALLLNQEL                             | CASB_HUMAN  | 1.41 | 16, 17     | 0.304 |
| AVPVQALLLNQELLLNPTHQIYPVTQPLAPVHNPIS      | CASB_HUMAN  | 3.94 | 16, 17     | 0.239 |
| AVPVQALLLNQELLLNPTHQIYPVTQPLAPVHNPISV     | CASB_HUMAN  | 4.04 | 16, 17, 18 | 0.167 |
| AVVLPVPQPEIMEVPKAKDTVYT                   | CASB_HUMAN  | 2.53 | 17, 18, 19 | 0.052 |
| CGLKVACVSAAVSDESVAGDSG                    | KIBRA_HUMAN | 2.03 | 18         | 0.641 |
| DAAPDEKVLDSGFREIENK                       | PIGR_HUMAN  | 2.14 | 17, 18     | 0.304 |
| DADTLHSKLIPTQPSQGAP                       | BT1A1_HUMAN | 1.98 | 17, 18, 23 | 0.190 |

---

---

|                       |             |      |                |       |
|-----------------------|-------------|------|----------------|-------|
| DATDEDITSH            | OSTP_HUMAN  | 1.11 | 17             | 0.079 |
| DATDEDITSHM           | OSTP_HUMAN  | 1.24 | 17             | 0.136 |
| DDPDAPLQPVTPLQL       | CO4A_HUMAN  | 1.62 | 17             | 0.572 |
| DDPDAPLQPVTPLQLFEG    | CO4A_HUMAN  | 1.96 | 17, 18         | 0.589 |
| DDPDAPLQPVTPLQLFEGR   | CO4B_HUMAN  | 2.11 | 16, 17, 18     | 0.665 |
| DDPDAPLQPVTPLQLFEGRRN | CO4B_HUMAN  | 2.38 | 16, 17, 18, 19 | 0.860 |
| DDQSAETHSHKQSRLY      | OSTP_HUMAN  | 1.91 | 24             | 0.208 |
| DEDITSHMESEELNGAY     | OSTP_HUMAN  | 1.94 | 24             | 0.104 |
| DEDITSHMESEELNGAYK    | OSTP_HUMAN  | 2.07 | 24             | 0.093 |
| DESNEHSDVIDSQELS      | OSTP_HUMAN  | 1.80 | 24             | 0.059 |
| DESNEHSDVIDSQELSKVS   | OSTP_HUMAN  | 2.12 | 16             | 0.071 |
| DGREQEAEQMPEY         | BT1A1_HUMAN | 1.58 | 16, 17         | 0.117 |
| DGREQEAEQMPEYR        | BT1A1_HUMAN | 1.74 | 16, 17, 23     | 0.156 |
| DGREQEAEQMPEYRG       | BT1A1_HUMAN | 1.80 | 16, 17, 18, 23 | 0.232 |

---

---

|                            |             |      |                |       |
|----------------------------|-------------|------|----------------|-------|
| DGSRASVDSGSSEEQGGSSRA      | PIGR_HUMAN  | 2.03 | 17, 23         | 0.664 |
| DGSRASVDSGSSEEQGGSSRALVST  | PIGR_HUMAN  | 2.43 | 16             | 0.362 |
| DIQYPDATD                  | OSTP_HUMAN  | 1.04 | 17             | 0.147 |
| DIQYPDATDEDIT              | OSTP_HUMAN  | 1.50 | 17, 18         | 0.116 |
| DIQYPDATDEDITSH            | OSTP_HUMAN  | 1.72 | 16, 17, 18, 24 | 0.099 |
| DIQYPDATDEDITSHM           | OSTP_HUMAN  | 1.85 | 24             | 0.148 |
| DIQYPDATDEDITSHMESEELNGAY  | OSTP_HUMAN  | 2.84 | 16             | 0.304 |
| DIQYPDATDEDITSHMESEELNGAYK | OSTP_HUMAN  | 2.97 | 17, 18, 24     | 0.328 |
| DITPLMAAANGGHVKI           | ANR17_HUMAN | 1.61 | 17             | 0.378 |
| DITSHMESEELNGAY            | OSTP_HUMAN  | 1.70 | 24             | 0.090 |
| DITSHMESEELNGAYK           | OSTP_HUMAN  | 1.82 | 24             | 0.087 |
| DLEKLGKSPPPPPPP            | SKT_HUMAN   | 1.72 | 17, 18         | 0.655 |
| DLENLH                     | CASB_HUMAN  | 0.74 | 19             | 0.146 |
| DLENLHLPL                  | CASB_HUMAN  | 1.06 | 19             | 0.414 |

---

---

|                      |              |      |                |       |
|----------------------|--------------|------|----------------|-------|
| DLENLHLPLP           | CASB_HUMAN   | 1.16 | 16, 17, 22     | 0.446 |
| DLENLHLPLPLL         | CASB_HUMAN   | 1.39 | 20             | 0.740 |
| DLENLHLPLPLLQPLM     | CASB_HUMAN   | 1.86 | 19             | 0.805 |
| DLLVEILMRPTIS        | TP4AP_HUMAN  | 1.50 | 17             | 0.179 |
| DNNLTEAQRFSLLP       | B4DPT7_HUMAN | 1.59 | 17             | 0.227 |
| DPDAPLQPVTPLQL       | CO4B_HUMAN   | 1.50 | 16, 17, 18, 19 | 0.554 |
| DPDAPLQPVTPLQLFEGRRN | CO4B_HUMAN   | 2.26 | 16             | 0.641 |
| DPQIPKLTDLLE         | CASB_HUMAN   | 1.27 | 17, 18         | 0.263 |
| DPQIPKLTDLLENL       | CASB_HUMAN   | 1.50 | 16, 17, 18     | 0.387 |
| DPQIPKLTDLLENLH      | CASB_HUMAN   | 1.63 | 16, 17, 18     | 0.335 |
| DPQIPKLTDLLENLHLP    | CASB_HUMAN   | 1.84 | 16, 17, 18     | 0.544 |
| DPQIPKLTDLLENLHLPLP  | CASB_HUMAN   | 2.05 | 17, 18         | 0.693 |
| DPSKPSSNVAGVVI       | MRC1_HUMAN   | 1.37 | 17, 18         | 0.335 |
| DPSKPSSNVAGVVII      | MRC1_HUMAN   | 1.48 | 17, 18         | 0.340 |

---

---

|                                   |            |      |                |       |
|-----------------------------------|------------|------|----------------|-------|
| DPSKPSSNVAGVVIIV                  | MRC1_HUMAN | 1.58 | 17, 18         | 0.399 |
| DPSKPSSNVAGVVIIVI                 | MRC1_HUMAN | 1.70 | 17, 18         | 0.447 |
| DQADGSRASVDSGSSEEQGG              | PIGR_HUMAN | 1.94 | 17             | 0.164 |
| DQADGSRASVDSGSSEEQGGSS            | PIGR_HUMAN | 2.11 | 17             | 0.346 |
| DQADGSRASVDSGSSEEQGGSSR           | PIGR_HUMAN | 2.27 | 17, 18, 23     | 0.334 |
| DQADGSRASVDSGSSEEQGGSSRA          | PIGR_HUMAN | 2.34 | 16, 17, 18, 23 | 0.299 |
| DQADGSRASVDSGSSEEQGGSSRAL         | PIGR_HUMAN | 2.45 | 16             | 0.302 |
| DQADGSRASVDSGSSEEQGGSSRALVS       | PIGR_HUMAN | 2.64 | 16             | 0.174 |
| DQADGSRASVDSGSSEEQGGSSRALVST      | PIGR_HUMAN | 2.74 | 16, 17, 18, 23 | 0.164 |
| DQADGSRASVDSGSSEEQGGSSRALVSTL     | PIGR_HUMAN | 2.85 | 16, 17, 18     | 0.182 |
| DQADGSRASVDSGSSEEQGGSSRALVSTLV    | PIGR_HUMAN | 2.95 | 16, 17, 18     | 0.192 |
| DQADGSRASVDSGSSEEQGGSSRALVSTLVP   | PIGR_HUMAN | 3.05 | 17, 18         | 0.334 |
| DQADGSRASVDSGSSEEQGGSSRALVSTLVPL  | PIGR_HUMAN | 3.16 | 16, 17         | 0.626 |
| DQADGSRASVDSGSSEEQGGSSRALVSTLVPLG | PIGR_HUMAN | 3.22 | 16, 17, 18     | 0.618 |

---

---

|                                                   |            |      |                |       |
|---------------------------------------------------|------------|------|----------------|-------|
| DQSAETHSHKQSRLY                                   | OSTP_HUMAN | 1.79 | 24             | 0.190 |
| DQTVSDNELQEMSNQGSKYVNKEIQNAVNGVKQIK               | CLUS_HUMAN | 3.94 | 17, 18         | 0.580 |
| DRSPYEKVSAGNGGSSLSY                               | MUC1_HUMAN | 1.97 | 17             | 0.330 |
| DSEHKRKKVEAQLQELQVKFNEGERVRTELADKVTKLQVELDNVTGLLS | MYH9_HUMAN | 5.65 | 17             | 0.033 |
| DSGEGDFLAEGGGVR                                   | FIBA_HUMAN | 1.47 | 16, 17, 23     | 0.604 |
| DSGSSEEKQLYNKYPDAVAT                              | SP-1_HUMAN | 2.20 | 19             | 0.178 |
| DSGSSEEQGGSSRA                                    | PIGR_HUMAN | 1.35 | 17, 18         | 0.184 |
| DSGSSEEQGGSSRAL                                   | PIGR_HUMAN | 1.47 | 17, 18         | 0.310 |
| DSGSSEEQGGSSRALV                                  | PIGR_HUMAN | 1.57 | 16             | 0.299 |
| DSGSSEEQGGSSRALVST                                | PIGR_HUMAN | 1.75 | 23             | 0.291 |
| DSGSSEEQGGSSRALVSTLVP                             | PIGR_HUMAN | 2.06 | 16, 18         | 0.677 |
| DSGSSEEQGGSSRALVSTLVPL                            | PIGR_HUMAN | 2.18 | 17, 18, 21     | 0.835 |
| DSGSSEEQGGSSRALVSTLVPLG                           | PIGR_HUMAN | 2.23 | 16, 17, 18, 21 | 0.870 |
| DTRDQADGSRASVDSGSSEEQGGSS                         | PIGR_HUMAN | 2.49 | 16             | 0.375 |

---

---

|                                   |             |      |            |       |
|-----------------------------------|-------------|------|------------|-------|
| DTRDQADGSRASVDSGSSEEQGGSSRA       | PIGR_HUMAN  | 2.71 | 16, 17, 23 | 0.296 |
| DTVYTKGRVMPVL                     | CASB_HUMAN  | 1.48 | 17         | 0.192 |
| DTVYTKGRVMPVLK                    | CASB_HUMAN  | 1.61 | 17         | 0.169 |
| DTVYTKGRVMPVLKSPTIPFFDPQIPK       | CASB_HUMAN  | 3.08 | 17, 18     | 0.064 |
| DWDSRGKDSYETSQLDDQSAETHSHKQSRLY   | OSTP_HUMAN  | 3.67 | 24         | 0.613 |
| DWGSDTEEGPSPQFTLDFGNDA            | PDD2L_HUMAN | 2.39 | 17         | 0.357 |
| EDITSHME                          | OSTP_HUMAN  | 0.96 | 17         | 0.114 |
| EDITSHMESEELNGAYK                 | OSTP_HUMAN  | 1.95 | 17, 24     | 0.077 |
| EDITSHMESEELNGAYKAIPVAQD          | OSTP_HUMAN  | 2.65 | 17         | 0.224 |
| EDLIDEDDIPVRSFFP                  | C4AV_HUMAN  | 1.91 | 19         | 0.316 |
| EEDKHLKFRIS                       | OSTP_HUMAN  | 1.40 | 24         | 0.255 |
| EEKAVADTRDQADGSR                  | PIGR_HUMAN  | 1.75 | 17         | 0.076 |
| EEKAVADTRDQADGSRASVDSGSSEEQGGSSRA | PIGR_HUMAN  | 3.34 | 16         | 0.048 |
| EFCLKHRSCPPGFGVVQAGTPERNTVCKR     | TR11B_HUMAN | 3.22 | 16         | 0.628 |

---

---

|                            |              |      |                |       |
|----------------------------|--------------|------|----------------|-------|
| EGDFLAEGGGVR               | FIBA_HUMAN   | 1.21 | 17             | 0.543 |
| EGGFVEGVNK                 | CEL_HUMAN    | 1.04 | 17             | 0.155 |
| EGGFVEGVNKK                | BSAL_HUMAN   | 1.16 | 23             | 0.195 |
| EHESEGGRTPL                | ANR17_HUMAN  | 1.21 | 17             | 0.148 |
| EIPLSPMGEDSAPRDADTLH       | BT1A1_HUMAN  | 2.15 | 17, 18         | 0.257 |
| EISIPASSLPRLTP             | BT1A1_HUMAN  | 1.48 | 17, 18         | 0.432 |
| EKAVADTRDQADG              | PIGR_HUMAN   | 1.38 | 17             | 0.093 |
| EKQTDEIKDTR                | CASA1_HUMAN  | 1.36 | 23             | 0.073 |
| EKVKHEDQQQGEDEHQDK         | CASB_HUMAN   | 2.21 | 23             | 0.036 |
| ELLLNPTHQIYPVTQPLAPVHNPIS  | CASB_HUMAN   | 2.79 | 16, 17, 18     | 0.148 |
| ELLLNPTHQIYPVTQPLAPVHNPISV | CASB_HUMAN   | 2.89 | 16, 17, 18, 22 | 0.120 |
| ELQLGHHQRGAG               | Q9H273_HUMAN | 1.30 | 18             | 0.264 |
| ENLHLPLPLL                 | CASB_HUMAN   | 1.16 | 22             | 0.687 |
| ENLHLPLPLLQ                | CASB_HUMAN   | 1.29 | 16, 17         | 0.457 |

---



---

|                        |             |      |                |       |
|------------------------|-------------|------|----------------|-------|
| ENLHLPLPLLQPLM         | CASB_HUMAN  | 1.63 | 22             | 0.767 |
| ESEELNGAYK             | OSTP_HUMAN  | 1.14 | 17             | 0.124 |
| ESIRETEVIDPQDLLEGR     | SDC4_HUMAN  | 2.10 | 17, 18         | 0.078 |
| ESLSSSEESITEYK         | CASB_HUMAN  | 1.59 | 16, 17, 18, 23 | 0.081 |
| ESLSSSEESITEYKQKVEK    | CASB_HUMAN  | 2.20 | 16             | 0.064 |
| ESREEYMNGMNR           | CASA1_HUMAN | 1.52 | 17             | 0.309 |
| ETIESLSSSEE            | CASB_HUMAN  | 1.21 | 17, 18         | 0.036 |
| ETIESLSSSEESITE        | CASB_HUMAN  | 1.64 | 17, 18         | 0.049 |
| ETIESLSSSEESITEY       | CASB_HUMAN  | 1.80 | 17, 18         | 0.048 |
| ETIESLSSSEESITEYK      | CASB_HUMAN  | 1.93 | 16, 17, 18, 23 | 0.053 |
| ETIESLSSSEESITEYKQ     | CASB_HUMAN  | 2.06 | 16             | 0.048 |
| ETIESLSSSEESITEYKQK    | CASB_HUMAN  | 2.19 | 16, 17, 18, 23 | 0.050 |
| ETIESLSSSEESITEYKQKVE  | CASB_HUMAN  | 2.42 | 16, 17, 18     | 0.072 |
| ETIESLSSSEESITEYKQKVEK | CASB_HUMAN  | 2.55 | 16, 17, 18, 23 | 0.070 |

---

---

|                                              |            |      |            |       |
|----------------------------------------------|------------|------|------------|-------|
| ETIESLSSEESITEYKQKVEKVKHEDQQQGEDE            | CASB_HUMAN | 3.97 | 17         | 0.016 |
| ETSQLDDQSAETHSHKQSRLY                        | OSTP_HUMAN | 2.46 | 24         | 0.497 |
| EVPKAKDTVYTK                                 | CASB_HUMAN | 1.38 | 23         | 0.118 |
| EYFARQISSFCSIDCTTILQLHEI                     | UBR4_HUMAN | 2.82 | 17         | 0.193 |
| FAEEKAVADTRDQADGSRASVDSGSSEEQGGSS            | PIGR_HUMAN | 3.33 | 16         | 0.096 |
| FAEEKAVADTRDQADGSRASVDSGSSEEQGGSSRA          | PIGR_HUMAN | 3.56 | 16, 17, 18 | 0.070 |
| FAEEKAVADTRDQADGSRASVDSGSSEEQGGSSRALVST      | PIGR_HUMAN | 3.96 | 16, 17, 18 | 0.042 |
| FAEEKAVADTRDQADGSRASVDSGSSEEQGGSSRALVSTL     | PIGR_HUMAN | 4.07 | 16         | 0.047 |
| FAEEKAVADTRDQADGSRASVDSGSSEEQGGSSRALVSTLVPLG | PIGR_HUMAN | 4.44 | 17, 18     | 0.242 |
| FDPQIPKL                                     | CASB_HUMAN | 0.96 | 21         | 0.837 |
| FDPQIPKLTDL                                  | CASB_HUMAN | 1.42 | 17, 18     | 0.432 |
| FDPQIPKLTDLNL                                | CASB_HUMAN | 1.64 | 17         | 0.561 |
| FDPQIPKLTDLNL                                | CASB_HUMAN | 1.64 | 20         | 0.561 |
| FDPQIPKLTDLNLHLP                             | CASB_HUMAN | 1.99 | 16         | 0.679 |

---

---

|                                             |             |      |                |       |
|---------------------------------------------|-------------|------|----------------|-------|
| FQPQPLIYPFVEPIPYG                           | CASB_HUMAN  | 2.01 | 22             | 0.718 |
| FRISHELDSASSEVN                             | OSTP_HUMAN  | 1.69 | 16, 17, 18, 24 | 0.105 |
| FRPDSPGSGNARPNPDWGTFFEEVSGNVSPGTR           | FIBA_HUMAN  | 3.50 | 17             | 0.344 |
| FRRPDIQYPDATD                               | OSTP_HUMAN  | 1.59 | 24             | 0.166 |
| FRRPDIQYPDATDEDITSHMESEELNGAY               | OSTP_HUMAN  | 3.40 | 24             | 0.115 |
| FRRPDIQYPDATDEDITSHMESEELNGAYK              | OSTP_HUMAN  | 3.53 | 16, 17, 18     | 0.115 |
| FRRPDIQYPDATDEDITSHMESEELNGAYKAIPVAQDLNAPSD | OSTP_HUMAN  | 4.82 | 17             | 0.055 |
| FVEPIPYGFLPQNILP                            | CASB_HUMAN  | 1.84 | 19             | 0.756 |
| GAGPGAGGAGGAGAGAGDPQLVAMIVNHL               | BD1L1_HUMAN | 2.44 | 18             | 0.401 |
| GAYKAIPVAQDLNAPSD                           | OSTP_HUMAN  | 1.73 | 17, 24         | 0.211 |
| GFLPQNILPLAQPA                              | CASB_HUMAN  | 1.48 | 17             | 0.531 |
| GFLPQNILPLAQPAV                             | CASB_HUMAN  | 1.58 | 17             | 0.512 |
| GFLPQNILPLAQPAVVLPVPQPEIMEVPK               | CASB_HUMAN  | 3.14 | 17, 18         | 0.392 |
| GFLPQNILPLAQPAVVLPVPQPEIMEVPKAKDTVYT        | CASB_HUMAN  | 3.92 | 16, 17, 18     | 0.241 |

---

---

|                                         |             |      |                |       |
|-----------------------------------------|-------------|------|----------------|-------|
| GFLPQNILPLAQPAVVLVPVQPEIMEVPAKADTVVYTKG | CASB_HUMAN  | 4.10 | 17             | 0.241 |
| GGQLELRALSHILQTPIEIIQADSPPIIVG          | OTU6B_HUMAN | 3.18 | 17, 18         | 0.120 |
| GIPFAAPTKALENPQPHPGWQGTL                | CEL_HUMAN   | 2.53 | 16, 17, 18     | 0.324 |
| GIPFAAPTKALENPQPHPGWQGTLK               | CEL_HUMAN   | 2.66 | 17, 18         | 0.289 |
| GKDSYETSQLDDQSAETHSHKQSRLY              | OSTP_HUMAN  | 3.01 | 24             | 0.458 |
| GPKGAKGNQGAAPIQNQQAWQQPGN               | CI169_HUMAN | 2.55 | 18             | 0.283 |
| GREQEAEQMPEYR                           | BT1A1_HUMAN | 1.62 | 17             | 0.168 |
| GRVMPVLKSPTIP                           | CASB_HUMAN  | 1.39 | 17, 22         | 0.332 |
| GRVMPVLKSPTIPF                          | CASB_HUMAN  | 1.54 | 16, 17         | 0.562 |
| GRVMPVLKSPTIPFFD                        | CASB_HUMAN  | 1.80 | 16, 17         | 0.550 |
| GRVMPVLKSPTIPFFDP                       | CASB_HUMAN  | 1.90 | 17, 18         | 0.560 |
| GRVMPVLKSPTIPFFDPQIP                    | CASB_HUMAN  | 2.24 | 16, 17, 18     | 0.470 |
| GRVMPVLKSPTIPFFDPQIPK                   | CASB_HUMAN  | 2.37 | 16, 17, 18, 19 | 0.145 |
| GRVMPVLKSPTIPFFDPQIPKL                  | CASB_HUMAN  | 2.48 | 17             | 0.091 |

---

---

|                                            |              |      |            |       |
|--------------------------------------------|--------------|------|------------|-------|
| GRVMPVLKSPTIPFFDPQIPKLT                    | CASB_HUMAN   | 2.70 | 16, 17, 18 | 0.098 |
| GRVMPVLKSPTIPFFDPQIPKLTDL                  | CASB_HUMAN   | 2.81 | 17         | 0.079 |
| GRVMPVLKSPTIPFFDPQIPKLTDLN                 | CASB_HUMAN   | 3.05 | 17, 18     | 0.065 |
| GRVMPVLKSPTIPFFDPQIPKLTDLNL                | CASB_HUMAN   | 3.17 | 17         | 0.065 |
| GRVMPVLKSPTIPFFDPQIPKLTDLNLHLP             | CASB_HUMAN   | 3.51 | 17         | 0.046 |
| GRVMPVLKSPTIPFFDPQIPKLTDLNLHLPLP           | CASB_HUMAN   | 3.72 | 17         | 0.038 |
| GYVKPQIKQVVPEFVNASADAGGSSATYMDQAPSPAVCPQAP | STA5A_HUMAN  | 4.28 | 17         | 0.114 |
| HCVETGSQEASAIYFTSGTSGLPKMAE                | A8K051_HUMAN | 2.80 | 17, 18     | 0.025 |
| HEDQQQGEDEHQDK                             | CASB_HUMAN   | 1.72 | 17         | 0.050 |
| HLKVAALGSDPHISMQVQENGEICLECTSVGWYPEPQV     | BT1A1_HUMAN  | 4.17 | 16         | 0.017 |
| HLPLLLQPLM                                 | CASB_HUMAN   | 1.27 | 17         | 0.813 |
| HLPLLLQPLMQQVPQPIPQT                       | CASB_HUMAN   | 2.39 | 17, 18, 19 | 0.445 |
| HNPISV                                     | CASB_HUMAN   | 0.67 | 17         | 0.172 |
| HQIYPVTQPLAPVH                             | CASB_HUMAN   | 1.60 | 22         | 0.212 |

---

---

|                           |             |      |                |       |
|---------------------------|-------------|------|----------------|-------|
| HQIYPVTQPLAPVHNPISV       | CASB_HUMAN  | 2.11 | 16, 17, 18, 22 | 0.292 |
| HSHEFHSHEDMLVVDPK         | OSTP_HUMAN  | 2.04 | 16, 24         | 0.173 |
| HSHEFHSHEDMLVVDPKSKEEDKHL | OSTP_HUMAN  | 3.01 | 16             | 0.116 |
| IESLSSSEESITEYK           | CASB_HUMAN  | 1.70 | 17, 18, 23     | 0.079 |
| IKLVKKEPMK                | S38A2_HUMAN | 1.21 | 17             | 0.155 |
| ILPLAQPAVVLPVPQPEIMEVPK   | CASB_HUMAN  | 2.48 | 16, 17, 18, 22 | 0.104 |
| IPFFDPQIPK                | CASB_HUMAN  | 1.20 | 17, 18         | 0.734 |
| IPFFDPQIPKL               | CASB_HUMAN  | 1.31 | 17             | 0.845 |
| IPFFDPQIPKLTDLN           | CASB_HUMAN  | 1.89 | 19             | 0.511 |
| IPFFDPQIPKLTDLN           | CASB_HUMAN  | 1.89 | 20             | 0.511 |
| IPLSPMGEDSAPR             | BT1A1_HUMAN | 1.37 | 17, 18         | 0.249 |
| IPLSPMGEDSAPRDADTLH       | BT1A1_HUMAN | 2.02 | 17             | 0.244 |
| IPQQVVPYPQRAVPVQ          | CASB_HUMAN  | 1.82 | 16             | 0.240 |
| IPQQVVPYPQRAVPVQA         | CASB_HUMAN  | 1.89 | 16, 17         | 0.205 |

---

---

|                                                  |            |      |        |       |
|--------------------------------------------------|------------|------|--------|-------|
| IPQRQYLPNSHPP                                    | CASK_HUMAN | 1.55 | 16     | 0.409 |
| IPQRQYLPNSHPPT                                   | CASK_HUMAN | 1.65 | 16     | 0.389 |
| IPQRQYLPNSHPPTV                                  | CASK_HUMAN | 1.75 | 16     | 0.411 |
| IPQRQYLPNSHPPTVV                                 | CASK_HUMAN | 1.85 | 16     | 0.377 |
| IPVAQDLNAPS                                      | OSTP_HUMAN | 1.12 | 16, 24 | 0.219 |
| IPVAQDLNAPSD                                     | OSTP_HUMAN | 1.24 | 17, 24 | 0.154 |
| IPVKQADSGSSEEKQLYNKYPDAVAT                       | OSTP_HUMAN | 2.84 | 16, 24 | 0.146 |
| IPVKQADSGSSEEKQLYNKYPDAVATWLNPDPSQK              | OSTP_HUMAN | 3.91 | 16, 17 | 0.271 |
| IPVKQADSGSSEEKQLYNKYPDAVATWLNPDPSQKQN            | OSTP_HUMAN | 4.15 | 16, 17 | 0.263 |
| IQYPDATDEDITSH                                   | OSTP_HUMAN | 1.60 | 24     | 0.103 |
| IQYPDATDEDITSHMESEELNGAYK                        | OSTP_HUMAN | 2.86 | 24     | 0.243 |
| ISHELDSASSEVN                                    | OSTP_HUMAN | 1.39 | 16, 24 | 0.100 |
| IYPFVEPIPYGFLPQN                                 | CASB_HUMAN | 1.89 | 20     | 0.641 |
| IYPSFQPQLIYPFVEPIPYGFLPQNILPLAQPAVVLPVPQPEIMEVPK | CASB_HUMAN | 5.53 | 17     | 0.033 |

---

---

|                                    |             |      |                |       |
|------------------------------------|-------------|------|----------------|-------|
| IYPVTQPLAPVHNP                     | CASB_HUMAN  | 1.55 | 22             | 0.217 |
| IYPVTQPLAPVHNPISV                  | CASB_HUMAN  | 1.85 | 16, 17, 18, 22 | 0.292 |
| KANDESNEHSDVIDSQELSKVS             | OSTP_HUMAN  | 2.43 | 24             | 0.064 |
| KDTVYTKGR                          | CASB_HUMAN  | 1.07 | 17             | 0.167 |
| KEIPLSPMGEDSAPRDADTLH              | BT1A1_HUMAN | 2.28 | 16, 17         | 0.228 |
| KEIPLSPMGEDSAPRDADTLHSKLIPTQ       | BT1A1_HUMAN | 3.05 | 17, 18         | 0.136 |
| KEIPLSPMGEDSAPRDADTLHSKLIPTQPSQGAP | BT1A1_HUMAN | 3.59 | 17, 18         | 0.089 |
| KEISPLLSMEAMAFVTEERK               | TP4AP_HUMAN | 2.31 | 17             | 0.368 |
| KFRRPDIQYPDATD                     | OSTP_HUMAN  | 1.72 | 24             | 0.140 |
| KFRRPDIQYPDATDEDITSHMESEELNGAY     | OSTP_HUMAN  | 3.53 | 24             | 0.077 |
| KFRRPDIQYPDATDEDITSHMESEELNGAYK    | OSTP_HUMAN  | 3.66 | 16, 17, 18     | 0.071 |
| KKEPAESSFRFWQARAVESFLRGTTSYADQMFL  | TP4AP_HUMAN | 3.89 | 17             | 0.113 |
| KKSLVEREHLNQVL                     | PAPP2_HUMAN | 1.69 | 17             | 0.203 |
| KLIPTQPSQGAP                       | BT1A1_HUMAN | 1.24 | 17, 18         | 0.208 |

---



---

|                              |             |      |                |       |
|------------------------------|-------------|------|----------------|-------|
| KNVLQGQHEADKI                | PTPRR_HUMAN | 1.48 | 17             | 0.092 |
| KPLILVYMRHAYGLGEHYNSVTRLV    | OTU6B_HUMAN | 2.93 | 17             | 0.103 |
| KSPTIPFFDPQIPKLTLD           | CASB_HUMAN  | 1.94 | 22             | 0.438 |
| KSVVPGGGAVEAALSIYLENYATS     | TCPA_HUMAN  | 2.40 | 18             | 0.199 |
| KTIVKLQNTSRI                 | SUCO_HUMAN  | 1.40 | 17             | 0.073 |
| KVEKVKHEDQQQGEDEHQDK         | CASB_HUMAN  | 2.44 | 23             | 0.038 |
| KVLPIPQQVVPYPQR              | CASB_HUMAN  | 1.76 | 22             | 0.365 |
| LALPPQPLWSVPQPK              | CASB_HUMAN  | 1.67 | 16             | 0.680 |
| LAPVHNPISV                   | CASB_HUMAN  | 1.05 | 16, 22         | 0.271 |
| LAQPAVVLPVPQPEIMEVPK         | CASB_HUMAN  | 2.16 | 16, 17, 18, 19 | 0.360 |
| LAQPAVVLPVPQPEIMEVPKA        | CASB_HUMAN  | 2.23 | 17, 18, 22     | 0.106 |
| LAQPAVVLPVPQPEIMEVPKAKDT     | CASB_HUMAN  | 2.57 | 17, 18         | 0.080 |
| LAQPAVVLPVPQPEIMEVPKAKDTVYT  | CASB_HUMAN  | 2.94 | 16, 17, 18     | 0.051 |
| LAQPAVVLPVPQPEIMEVPKAKDTVYTK | CASB_HUMAN  | 3.06 | 16, 17, 18     | 0.054 |

---

---

|                                             |             |      |            |       |
|---------------------------------------------|-------------|------|------------|-------|
| LAQPAVVLVPVPQPEIMEVPKAKDTVYTKG              | CASB_HUMAN  | 3.12 | 16, 17, 18 | 0.053 |
| LAQPAVVLVPVPQPEIMEVPKAKDTVYTKGR             | CASB_HUMAN  | 3.28 | 17, 18     | 0.098 |
| LENFLRSLNSSEPLFLGQTGLGT                     | CHSS1_HUMAN | 2.49 | 17         | 0.079 |
| LENLHLPLPLLQ                                | CASB_HUMAN  | 1.40 | 22         | 0.460 |
| LFAEEKAVADTRDQA                             | PIGR_HUMAN  | 1.66 | 16         | 0.102 |
| LFAEEKAVADTRDQADGSR                         | PIGR_HUMAN  | 2.08 | 16, 17, 18 | 0.094 |
| LFAEEKAVADTRDQADGSRASVDSGSSEEQGGSSRA        | PIGR_HUMAN  | 3.67 | 16, 17, 18 | 0.068 |
| LFAEEKAVADTRDQADGSRASVDSGSSEEQGGSSRALVSTLV  | PIGR_HUMAN  | 4.29 | 17, 18     | 0.073 |
| LFAEEKAVADTRDQADGSRASVDSGSSEEQGGSSRALVSTLVP | PIGR_HUMAN  | 4.38 | 16, 17     | 0.123 |
| LGAVYTEGGFVEGVNKKLGLLGDSVDIFK               | CEL_HUMAN   | 3.03 | 17         | 0.071 |
| LGSAMQNTQNLLQMPY                            | A2M_HUMAN   | 1.81 | 19         | 0.264 |
| LHLPLPLL                                    | CASB_HUMAN  | 0.92 | 22         | 0.781 |
| LHLPLPLLQ                                   | CASB_HUMAN  | 1.04 | 22         | 0.550 |
| LKSPTIPFFDPQIPKLTDLLEN                      | CASB_HUMAN  | 2.41 | 19         | 0.089 |

---

---

|                                 |            |      |                |       |
|---------------------------------|------------|------|----------------|-------|
| LLLNPTHQIYPVTQPLAPVHNPIS        | CASB_HUMAN | 2.66 | 17, 18         | 0.230 |
| LLLNPTHQIYPVTQPLAPVHNPISV       | CASB_HUMAN | 2.76 | 16, 17, 18, 22 | 0.171 |
| LLLNQEALLNPTHQ                  | CASB_HUMAN | 1.65 | 22             | 0.134 |
| LLLNQEALLNPTHQIYPV              | CASB_HUMAN | 2.12 | 19             | 0.223 |
| LLLNQEALLNPTHQIYPVTQ            | CASB_HUMAN | 2.35 | 17             | 0.123 |
| LLLNQEALLNPTHQIYPVTQPLAP        | CASB_HUMAN | 2.73 | 19             | 0.174 |
| LLLNQEALLNPTHQIYPVTQPLAPVHNP    | CASB_HUMAN | 3.17 | 22             | 0.207 |
| LLLNQEALLNPTHQIYPVTQPLAPVHNPIS  | CASB_HUMAN | 3.37 | 17             | 0.158 |
| LLLNQEALLNPTHQIYPVTQPLAPVHNPISV | CASB_HUMAN | 3.47 | 16, 17, 18, 22 | 0.120 |
| LLNPTHQIYP                      | CASB_HUMAN | 1.20 | 17             | 0.208 |
| LLNPTHQIYPVT                    | CASB_HUMAN | 1.40 | 19             | 0.165 |
| LLNPTHQIYPVTQ                   | CASB_HUMAN | 1.52 | 17             | 0.106 |
| LLNPTHQIYPVTQPLA                | CASB_HUMAN | 1.81 | 17             | 0.148 |
| LLNPTHQIYPVTQPLAPVHNP           | CASB_HUMAN | 2.35 | 17             | 0.120 |

---

---

|                                 |            |      |                |       |
|---------------------------------|------------|------|----------------|-------|
| LLNPETHQIYPVTQPLAPVHNPI         | CASB_HUMAN | 2.46 | 17             | 0.161 |
| LLNPETHQIYPVTQPLAPVHNPI         | CASB_HUMAN | 2.55 | 16, 17, 18     | 0.157 |
| LLNPETHQIYPVTQPLAPVHNPI         | CASB_HUMAN | 2.65 | 16, 17, 18, 23 | 0.124 |
| LLNQELLLNPETHQ                  | CASB_HUMAN | 1.53 | 17, 18, 22     | 0.126 |
| LLNQELLLNPETHQIY                | CASB_HUMAN | 1.81 | 17             | 0.164 |
| LLNQELLLNPETHQIYPV              | CASB_HUMAN | 2.01 | 27             | 0.212 |
| LLNQELLLNPETHQIYPVTQ            | CASB_HUMAN | 2.24 | 17             | 0.118 |
| LLNQELLLNPETHQIYPVTQPLAP        | CASB_HUMAN | 2.61 | 17             | 0.095 |
| LLNQELLLNPETHQIYPVTQPLAPVHNPI   | CASB_HUMAN | 3.26 | 16, 17, 18     | 0.124 |
| LLNQELLLNPETHQIYPVTQPLAPVHNPI   | CASB_HUMAN | 3.36 | 16, 17, 18, 22 | 0.082 |
| LLQPLMQQVPQPIPQT                | CASB_HUMAN | 1.83 | 16, 17, 18     | 0.267 |
| LLQPLMQQVPQPIPQTL               | CASB_HUMAN | 1.95 | 16             | 0.387 |
| LLQPLMQQVPQPIPQTLALPPQP         | CASB_HUMAN | 2.55 | 16, 17, 18, 19 | 0.376 |
| LLQPLMQQVPQPIPQTLALPPQPLWSVPQPK | CASB_HUMAN | 3.49 | 17             | 0.210 |

---

---

|                               |             |      |                |       |
|-------------------------------|-------------|------|----------------|-------|
| LMQQVPQPIPQT                  | CASB_HUMAN  | 1.38 | 16, 18         | 0.275 |
| LMQQVPQPIPQTLALPPQP           | CASB_HUMAN  | 2.10 | 17, 18         | 0.384 |
| LMQQVPQPIPQTLALPPQPLWSVPQP    | CASB_HUMAN  | 2.91 | 17, 18         | 0.180 |
| LNLNLRAVGSGATFSHYYYMILS       | CO4A_HUMAN  | 2.59 | 18             | 0.032 |
| LNPTHQIYPVTQ                  | CASB_HUMAN  | 1.41 | 17             | 0.117 |
| LNPTHQIYPVTQPLAPVH            | CASB_HUMAN  | 2.03 | 22             | 0.163 |
| LNPTHQIYPVTQPLAPVHNPIS        | CASB_HUMAN  | 2.44 | 16, 17, 18     | 0.164 |
| LNPTHQIYPVTQPLAPVHNPISV       | CASB_HUMAN  | 2.54 | 16, 17, 18, 23 | 0.127 |
| LNQELLLNPTHQ                  | CASB_HUMAN  | 1.42 | 22             | 0.122 |
| LNQELLLNPTHQIYPVTQPLAPVHNP    | CASB_HUMAN  | 2.95 | 17             | 0.194 |
| LNQELLLNPTHQIYPVTQPLAPVHNPIS  | CASB_HUMAN  | 3.15 | 16, 17, 18     | 0.163 |
| LNQELLLNPTHQIYPVTQPLAPVHNPISV | CASB_HUMAN  | 3.25 | 16, 17, 18, 22 | 0.129 |
| LPIQKLEPQIA                   | PLIN2_HUMAN | 1.36 | 16, 17, 18     | 0.180 |
| LPIPQQVVPYP                   | CASB_HUMAN  | 1.25 | 16, 17, 18     | 0.336 |

---

---

|                                  |             |      |            |       |
|----------------------------------|-------------|------|------------|-------|
| LPIPQQVVPYPQRA                   | CASB_HUMAN  | 1.61 | 16         | 0.434 |
| LPIPQQVVPYPQRAVP                 | CASB_HUMAN  | 1.80 | 16, 17, 18 | 0.353 |
| LPIPQQVVPYPQRAVPV                | CASB_HUMAN  | 1.90 | 16, 17     | 0.327 |
| LPIPQQVVPYPQRAVPVQ               | CASB_HUMAN  | 2.03 | 16, 17, 18 | 0.265 |
| LPIPQQVVPYPQRAVPVQA              | CASB_HUMAN  | 2.10 | 16, 17, 18 | 0.223 |
| LPIPQQVVPYPQRAVPVQAL             | CASB_HUMAN  | 2.21 | 16, 17, 18 | 0.401 |
| LPIPQQVVPYPQRAVPVQALL            | CASB_HUMAN  | 2.33 | 17, 18     | 0.164 |
| LPLAQPAVVLPVPQPEIMEVPKAKDTVYT    | CASB_HUMAN  | 3.15 | 17         | 0.035 |
| LPLRYPERLQNPSESSEPIP             | CASA1_HUMAN | 2.32 | 17, 18     | 0.206 |
| LPLRYPERLQNPSESSEPIPLESREEYMNGMN | CASA1_HUMAN | 3.78 | 16, 17, 18 | 0.534 |
| LPNSHPPTVV                       | CASK_HUMAN  | 1.06 | 16         | 0.377 |
| LPPTSNQDLGEASLQATLLGL            | GHDC_HUMAN  | 2.14 | 17, 18     | 0.547 |
| LPSSVQTVCESWNNINTNEFPNIGSWR      | UBR4_HUMAN  | 3.09 | 17         | 0.535 |
| LPVLEPLNPSRL                     | UBR4_HUMAN  | 1.35 | 17         | 0.642 |

---

---

|                                            |             |      |                |       |
|--------------------------------------------|-------------|------|----------------|-------|
| LPVPQPEIMEVPK                              | CASB_HUMAN  | 1.48 | 16, 17         | 0.341 |
| LPVPQPEIMEVPKA                             | CASB_HUMAN  | 1.55 | 17             | 0.348 |
| LPVPQPEIMEVPKAKDT                          | CASB_HUMAN  | 1.89 | 16, 17         | 0.287 |
| LPVPQPEIMEVPKAKDTVYT                       | CASB_HUMAN  | 2.26 | 16, 17         | 0.360 |
| LQDFNVGDYIEAVLDRNLAENISRVLYPND             | PYGB_HUMAN  | 3.47 | 17             | 0.196 |
| LQNPSSESSEPIPLESREEYMNGMN                  | CASA1_HUMAN | 2.75 | 16, 17, 18     | 0.580 |
| LQPLMQQVPQPIP                              | CASB_HUMAN  | 1.49 | 19             | 0.290 |
| LSQSLLLDITPEINPL                           | SUCO_HUMAN  | 1.77 | 17             | 0.354 |
| LSSSEESITEYK                               | CASB_HUMAN  | 1.37 | 16, 17, 18, 23 | 0.094 |
| LSSSEESITEYKQKVEK                          | CASB_HUMAN  | 1.99 | 16, 23         | 0.072 |
| LTDLENLHLPLPLLQP                           | CASB_HUMAN  | 1.83 | 19             | 0.290 |
| LTNNLATYGPRGKVFVHGWHLRWGVFDEYNVDQPFYISRRNT | CLCA3_HUMAN | 5.10 | 17             | 0.381 |
| LVLLGVSIFLVSAQNPTTAAPADTYPATGPAD           | MUCL1_HUMAN | 3.17 | 18             | 0.699 |
| LVNERWVLTA                                 | KA-7_HUMAN  | 1.27 | 19             | 0.138 |

---

---

|                              |              |      |            |       |
|------------------------------|--------------|------|------------|-------|
| LWSVPQPK                     | CASB_HUMAN   | 0.95 | 20         | 0.506 |
| LWSVPQPKVLPPI                | CASB_HUMAN   | 1.47 | 19         | 0.615 |
| LWSVPQPKVLPPI                | CASB_HUMAN   | 1.47 | 20         | 0.615 |
| LWSVPQPKVLPPIQQV             | CASB_HUMAN   | 1.83 | 19         | 0.423 |
| LWSVPQPKVLPPIQQVVPYPQRAVPVQA | CASB_HUMAN   | 3.14 | 17         | 0.192 |
| MASVAVDPQ                    | PLIN2_HUMAN  | 0.92 | 17         | 0.121 |
| MESEELNGAYK                  | OSTP_HUMAN   | 1.27 | 16, 17     | 0.100 |
| MGNLTVTEVSWDA                | TENA_HUMAN   | 1.42 | 18         | 0.090 |
| MKFISTSLLLMLLVSSLS           | BCAC-1_HUMAN | 1.98 | 19         | 0.495 |
| MLVVDPKSKEED                 | OSTP_HUMAN   | 1.39 | 24         | 0.069 |
| MPVLKSPTIP                   | CASB_HUMAN   | 1.09 | 16, 17     | 0.287 |
| MPVLKSPTIPFFD                | CASB_HUMAN   | 1.50 | 17         | 0.555 |
| MPVLKSPTIPFFDPQIP            | CASB_HUMAN   | 1.93 | 16, 17, 18 | 0.457 |
| MPVLKSPTIPFFDPQIPK           | CASB_HUMAN   | 2.06 | 16, 17, 18 | 0.457 |

---



---

|                                          |              |      |            |       |
|------------------------------------------|--------------|------|------------|-------|
| MPVLKSPTIPFFDPQIPKLTDLN                  | CASB_HUMAN   | 2.75 | 17, 18     | 0.050 |
| MQQVPQPIQTLALPPQPLWSVPQP                 | CASB_HUMAN   | 2.80 | 17         | 0.213 |
| MQQVPQPIQTLALPPQPLWSVPQPK                | CASB_HUMAN   | 2.92 | 17         | 0.248 |
| MTTLMVSARSSLPRAS                         | A8K496_HUMAN | 1.71 | 18         | 0.124 |
| NDESNEHSDVIDSQELSKVS                     | OSTP_HUMAN   | 2.24 | 16, 24     | 0.068 |
| NFGSKEDANVFASAMMHALEVLNSQETGPTLPRQNSQLPA | ENAH_HUMAN   | 4.31 | 17         | 0.068 |
| NGAYKAIPVAQDLNAPSD                       | OSTP_HUMAN   | 1.85 | 24         | 0.184 |
| NILLQLRQGQLTGR                           | TP4AP_HUMAN  | 1.61 | 17         | 0.250 |
| NILPLAQPAVVLPVPQPEIMEVPK                 | CASB_HUMAN   | 2.60 | 16, 17, 18 | 0.109 |
| NILPLAQPAVVLPVPQPEIMEVPKAKDTVYTK         | CASB_HUMAN   | 3.51 | 16, 17, 18 | 0.057 |
| NLHLPLPLL                                | CASB_HUMAN   | 1.03 | 22         | 0.776 |
| NPAVAATSANL                              | MUC1_HUMAN   | 1.03 | 16, 17, 23 | 0.220 |
| NPAVVRPHAQIPQR                           | CASK_HUMAN   | 1.59 | 17         | 0.325 |
| NPSESSEPIPLE                             | CASA1_HUMAN  | 1.30 | 16         | 0.224 |

---

---

|                         |             |      |                |       |
|-------------------------|-------------|------|----------------|-------|
| NPSESSEPIPLESREEYMNGMN  | CASA1_HUMAN | 2.52 | 17, 18         | 0.530 |
| NPSESSEPIPLESREEYMNGMNR | CASA1_HUMAN | 2.67 | 17, 18         | 0.639 |
| NPTHQIYPVTQ             | CASB_HUMAN  | 1.30 | 16, 17, 18     | 0.122 |
| NPTHQIYPVTQPL           | CASB_HUMAN  | 1.51 | 17, 18         | 0.26  |
| NPTHQIYPVTQPLAPVH       | CASB_HUMAN  | 1.92 | 16, 17         | 0.191 |
| NPTHQIYPVTQPLAPVHNP     | CASB_HUMAN  | 2.13 | 16             | 0.172 |
| NPTHQIYPVTQPLAPVHNPIS   | CASB_HUMAN  | 2.33 | 16, 17, 18     | 0.273 |
| NPTHQIYPVTQPLAPVHNPISV  | CASB_HUMAN  | 2.43 | 16, 17, 18, 23 | 0.218 |
| NQELLLNPT               | CASB_HUMAN  | 1.05 | 22             | 0.254 |
| NQELLLNPTHQ             | CASB_HUMAN  | 1.31 | 17, 18, 22     | 0.150 |
| NQELLLNPTHQIYPV         | CASB_HUMAN  | 1.78 | 20             | 0.294 |
| NQELLLNPTHQIYPVT        | CASB_HUMAN  | 1.89 | 17, 18         | 0.258 |
| NQELLLNPTHQIYPVTQ       | CASB_HUMAN  | 2.01 | 17             | 0.158 |
| NQELLLNPTHQIYPVTQPLAPV  | CASB_HUMAN  | 2.49 | 16             | 0.086 |

---

---

|                                           |              |      |                |       |
|-------------------------------------------|--------------|------|----------------|-------|
| NQELLLNPTHQIYPVTQPLAPVH                   | CASB_HUMAN   | 2.63 | 16, 17, 18     | 0.094 |
| NQELLLNPTHQIYPVTQPLAPVHNP                 | CASB_HUMAN   | 2.84 | 16, 17, 18     | 0.132 |
| NQELLLNPTHQIYPVTQPLAPVHNPI                | CASB_HUMAN   | 2.95 | 16, 17, 18     | 0.159 |
| NQELLLNPTHQIYPVTQPLAPVHNPIIS              | CASB_HUMAN   | 3.04 | 16, 17, 18     | 0.136 |
| NQELLLNPTHQIYPVTQPLAPVHNPIISV             | CASB_HUMAN   | 3.14 | 16, 17, 18, 23 | 0.119 |
| NSISDASRTSEYK                             | SKT_HUMAN    | 1.46 | 17             | 0.114 |
| PAVVLPVPQPEI                              | CASB_HUMAN   | 1.26 | 17, 18         | 0.194 |
| PAVVLPVPQPEIME                            | CASB_HUMAN   | 1.52 | 17             | 0.319 |
| PAVVLPVPQPEIMEVPKAKDTVYTKGR               | CASB_HUMAN   | 2.97 | 16             | 0.111 |
| PDIQYPDATDEDITSH                          | OSTP_HUMAN   | 1.82 | 24             | 0.119 |
| PDIQYPDATDEDITSHMESEELNGAY                | OSTP_HUMAN   | 2.95 | 16, 17         | 0.317 |
| PDIQYPDATDEDITSHMESEELNGAYK               | OSTP_HUMAN   | 3.07 | 16, 17, 18, 24 | 0.332 |
| PFERIMQLELCDEDVQDQVVTSIGELVEVCSTQIQSGWRPL | C5NM88_HUMAN | 4.70 | 17             | 0.128 |
| PFFDPQIPK                                 | CASB_HUMAN   | 1.09 | 16             | 0.766 |

---

---

|                                      |              |      |        |       |
|--------------------------------------|--------------|------|--------|-------|
| PGASGCLLPDGLPSTSASAAAAGAAPALY        | Q8NG43_HUMAN | 2.72 | 18     | 0.480 |
| PGSVGPKGSSGSPGPQGGPVGLQGLRGEVGLPG    | COHA1_HUMAN  | 3.14 | 18     | 0.326 |
| PHAQIPQRQYLPNSHPPTVVR                | CASK_HUMAN   | 2.44 | 20     | 0.425 |
| PIPQQVVPYPQRAVPVQALL                 | CASB_HUMAN   | 2.22 | 16     | 0.584 |
| PLAPVHNPISV                          | CASB_HUMAN   | 1.15 | 16, 17 | 0.335 |
| PLAQPAVVLVPVQPEI                     | CASB_HUMAN   | 1.67 | 17, 18 | 0.272 |
| PLAQPAVVLVPVQPEIMEVPK                | CASB_HUMAN   | 2.26 | 17     | 0.130 |
| PLAQPAVVLVPVQPEIMEVPKAKDTVYT         | CASB_HUMAN   | 3.04 | 16, 17 | 0.048 |
| PLAQPAVVLVPVQPEIMEVPKAKDTVYTKGRVMP   | CASB_HUMAN   | 3.71 | 16     | 0.056 |
| PLAQPAVVLVPVQPEIMEVPKAKDTVYTKGRVMPVL | CASB_HUMAN   | 3.92 | 16     | 0.052 |
| PLPLLQPLMQQVPQPIPQT                  | CASB_HUMAN   | 2.14 | 17, 18 | 0.488 |
| PPPPPPPPPPGPPPPGLPSGDHQPPTTA         | WASL_HUMAN   | 3.01 | 17     | 0.374 |
| PQIPKLTDLNL                          | CASB_HUMAN   | 1.39 | 17     | 0.359 |
| PQNILPLAQPAVVLVPVQPEIMEVPK           | CASB_HUMAN   | 2.82 | 17     | 0.126 |

---

---

|                                    |              |      |                |       |
|------------------------------------|--------------|------|----------------|-------|
| PQNILPLAQPAVVLPVPQPEIMEVPKAKDTVYTK | CASB_HUMAN   | 3.73 | 16             | 0.051 |
| PQPIPQTLALPPQPLWSVPQP              | CASB_HUMAN   | 2.31 | 16             | 0.248 |
| PQPIPQTLALPPQPLWSVPQPKV            | CASB_HUMAN   | 2.54 | 16             | 0.215 |
| PQTLALPPQPLWSVPQPKV                | CASB_HUMAN   | 2.10 | 16             | 0.649 |
| PRPALLLLLLLLGGAHGLFPEEPPPLSVAP     | F6IB19_HUMAN | 3.10 | 18             | 0.763 |
| PSGGGVPPPPPP                       | DIAP3_HUMAN  | 1.06 | 17             | 0.817 |
| PSQKQNLLAPQN                       | OSTP_HUMAN   | 1.34 | 17             | 0.333 |
| PTHQIYPVTQPLAPVHNPISV              | CASB_HUMAN   | 2.31 | 16, 17, 18, 23 | 0.252 |
| PTIPFFDPQIPK                       | CASB_HUMAN   | 1.40 | 17, 18         | 0.572 |
| PTIPFFDPQIPKL                      | CASB_HUMAN   | 1.52 | 17, 18         | 0.718 |
| PTIPFFDPQIPKLT                     | CASB_HUMAN   | 1.73 | 17, 18         | 0.417 |
| PVAQDLNAPS                         | OSTP_HUMAN   | 1.02 | 16             | 0.235 |
| PVAQDLNAPSD                        | OSTP_HUMAN   | 1.13 | 24             | 0.158 |
| PVLKSPTIPFFDPQIP                   | CASB_HUMAN   | 1.80 | 17             | 0.470 |

---

---

|                                       |             |      |                |       |
|---------------------------------------|-------------|------|----------------|-------|
| PVLKSPTIPFFDPQIPK                     | CASB_HUMAN  | 1.93 | 17, 18         | 0.477 |
| PVLKSPTIPFFDPQIPKLT                   | CASB_HUMAN  | 2.26 | 16             | 0.343 |
| PVTQPLAPVH                            | CASB_HUMAN  | 1.06 | 17             | 0.249 |
| PVTQPLAPVHNPIS                        | CASB_HUMAN  | 1.47 | 16, 17         | 0.245 |
| PVTQPLAPVHNPISV                       | CASB_HUMAN  | 1.57 | 16, 17, 18     | 0.284 |
| QAADGSMQPTSWRQEPQLCGMGTEQGCWIPVSSDKGS | EGF_HUMAN   | 3.96 | 17             | 0.251 |
| QALLNQELLLNPTHQ                       | CASB_HUMAN  | 1.85 | 16             | 0.272 |
| QALLNQELLLNPTHQIYPVTQPLAPVHNPISV      | CASB_HUMAN  | 3.68 | 17             | 0.158 |
| QELAQLLAQPEVGLIHQYCQGYW               | SEM3F_HUMAN | 2.69 | 18             | 0.910 |
| QELLLNPTHQIYPVTQPLAPVHNPIS            | CASB_HUMAN  | 2.93 | 16, 17, 18     | 0.152 |
| QELLLNPTHQIYPVTQPLAPVHNPISV           | CASB_HUMAN  | 3.02 | 16, 17, 18, 29 | 0.123 |
| QEPAGEGLPLRKSGSVENGFDTQIYTD           | NAV2_HUMAN  | 2.91 | 18             | 0.187 |
| QGEDEHQDK                             | CASB_HUMAN  | 1.09 | 17             | 0.067 |
| QGVNDNEEGFFS                          | FIBB_HUMAN  | 1.35 | 17, 18         | 0.403 |

---

---

|                                           |             |      |                |       |
|-------------------------------------------|-------------|------|----------------|-------|
| QHWSYGLRPG                                | GON1_HUMAN  | 1.21 | 16             | 0.835 |
| QISTAGTEASGTGNMKF                         | PYGB_HUMAN  | 1.70 | 17             | 0.308 |
| QIYPVTQPLAPVHNPISV                        | CASB_HUMAN  | 1.98 | 16, 17, 18     | 0.342 |
| QKVEKVKHEDQQQGEDEHQ                       | CASB_HUMAN  | 2.32 | 17             | 0.039 |
| QKVEKVKHEDQQQGEDEHQD                      | CASB_HUMAN  | 2.44 | 16, 17, 18, 23 | 0.036 |
| QKVEKVKHEDQQQGEDEHQDK                     | CASB_HUMAN  | 2.57 | 16, 17, 18, 23 | 0.097 |
| QKVEKVKHEDQQQGEDEHQDKIY                   | CASB_HUMAN  | 2.84 | 16             | 0.073 |
| QKVEKVKHEDQQQGEDEHQDKIYP                  | CASB_HUMAN  | 2.94 | 16, 23         | 0.131 |
| QKVEKVKHEDQQQGEDEHQDKIYPS                 | CASB_HUMAN  | 3.03 | 16, 17, 18     | 0.075 |
| QKVEKVKHEDQQQGEDEHQDKIYPSFQPQP            | CASB_HUMAN  | 3.63 | 17, 18         | 0.106 |
| QKVEKVKHEDQQQGEDEHQDKIYPSFQPQPLIYPFVEPIPY | CASB_HUMAN  | 4.96 | 16             | 0.046 |
| QLDDQSAETHSHKQSRLY                        | OSTP_HUMAN  | 2.15 | 24             | 0.186 |
| QLVLTGGTGSFGVFLVRQSETRRGEY                | SH2B1_HUMAN | 2.85 | 18             | 0.432 |
| QLYENKPRRPYIL                             | NEUT_HUMAN  | 1.69 | 16             | 0.485 |

---

---

|                                   |             |      |            |       |
|-----------------------------------|-------------|------|------------|-------|
| QNILPLAQPAVVLPVPQPEIMEVPK         | CASB_HUMAN  | 2.73 | 17, 18     | 0.124 |
| QNILPLAQPAVVLPVPQPEIMEVPKAKDTVYT  | CASB_HUMAN  | 3.51 | 17, 18     | 0.063 |
| QNILPLAQPAVVLPVPQPEIMEVPKAKDTVYTK | CASB_HUMAN  | 3.63 | 17         | 0.072 |
| QNPSESSEPIPLESREEYMNGMN           | CASA1_HUMAN | 2.64 | 17, 18     | 0.588 |
| QPAVVLPVPQPE                      | CASB_HUMAN  | 1.28 | 17, 18     | 0.255 |
| QPAVVLPVPQPEIM                    | CASB_HUMAN  | 1.52 | 17, 18     | 0.451 |
| QPAVVLPVPQPEIMEVPK                | CASB_HUMAN  | 1.98 | 16, 17, 18 | 0.412 |
| QPAVVLPVPQPEIMEVPKA               | CASB_HUMAN  | 2.05 | 16, 17, 18 | 0.419 |
| QPAVVLPVPQPEIMEVPKAKDTVYT         | CASB_HUMAN  | 2.76 | 17, 18     | 0.072 |
| QPAVVLPVPQPEIMEVPKAKDTVYTK        | CASB_HUMAN  | 2.88 | 17         | 0.076 |
| QPEIMEVPKAKDT                     | CASB_HUMAN  | 1.49 | 16         | 0.181 |
| QPKVLPQPQQVVPYP                   | CASB_HUMAN  | 1.71 | 17, 18     | 0.489 |
| QPLAPVHNPIS                       | CASB_HUMAN  | 1.18 | 17         | 0.422 |
| QPLAPVHNPISV                      | CASB_HUMAN  | 1.28 | 16, 17, 18 | 0.457 |

---



---

|                                         |             |      |            |       |
|-----------------------------------------|-------------|------|------------|-------|
| QPLMQQVPQPIP                            | CASB_HUMAN  | 1.38 | 16         | 0.326 |
| QPLMQQVPQPIPQT                          | CASB_HUMAN  | 1.61 | 16, 17, 18 | 0.278 |
| QPLMQQVPQPIPQTLALPPQP                   | CASB_HUMAN  | 2.33 | 17, 18, 19 | 0.273 |
| QPLMQQVPQPIPQTLALPPQPLWSVPQP            | CASB_HUMAN  | 3.13 | 17         | 0.175 |
| QPPLCGQTVCDNVELISQYNGYWP                | PAPP2_HUMAN | 2.73 | 17         | 0.235 |
| QPQPLIYPFVEPIP                          | CASB_HUMAN  | 1.64 | 20         | 0.724 |
| QQGEDEHQDKI                             | CASB_HUMAN  | 1.33 | 17, 18     | 0.101 |
| QQVPQPIPQT                              | CASB_HUMAN  | 1.14 | 16, 17     | 0.382 |
| QQVPQPIPQTLALPPQP                       | CASB_HUMAN  | 1.86 | 17         | 0.523 |
| QQVPQPIPQTLALPPQPLWSVPQP                | CASB_HUMAN  | 2.67 | 16, 17     | 0.194 |
| QRAVPVQALLLNQELLLNPTHQIYPVTQPLAPVHNPISV | CASB_HUMAN  | 4.33 | 16         | 0.197 |
| QRLVITARSIAIMRPNNLVHFTESKLPQMETEGMDEGK  | UBR4_HUMAN  | 4.35 | 17         | 0.069 |
| QRNILREKQTDEIKDT                        | CASA1_HUMAN | 1.99 | 16, 17     | 0.064 |
| QRNILREKQTDEIKDTR                       | CASA1_HUMAN | 2.15 | 16, 17     | 0.086 |

---

---

|                                   |             |      |                |       |
|-----------------------------------|-------------|------|----------------|-------|
| QTLALPPQPLWSVPQP                  | CASB_HUMAN  | 1.78 | 16             | 0.490 |
| QVLVPAGSARPVAFS                   | CO4A_HUMAN  | 1.50 | 17             | 0.369 |
| QYLPNSHPP                         | CASK_HUMAN  | 1.06 | 16             | 0.372 |
| QYLPNSHPPTVVR                     | CASK_HUMAN  | 1.51 | 16             | 0.336 |
| QYPDATDEDITSH                     | OSTP_HUMAN  | 1.50 | 24             | 0.115 |
| RAGAGRGAPEGPGPSGGAQGGG            | SRXN1_HUMAN | 1.86 | 18             | 0.492 |
| RAPRGPAGPAAQQAAKLFGLEPGRPPPTGPEHK | TNC18_HUMAN | 3.36 | 17             | 0.486 |
| RETIESLSSSEE                      | CASB_HUMAN  | 1.37 | 17, 18         | 0.034 |
| RETIESLSSSEESIT                   | CASB_HUMAN  | 1.67 | 17, 18         | 0.047 |
| RETIESLSSSEESITEY                 | CASB_HUMAN  | 1.97 | 16, 17, 18     | 0.044 |
| RETIESLSSSEESITEYK                | CASB_HUMAN  | 2.09 | 16, 17, 18, 23 | 0.047 |
| RETIESLSSSEESITEYK                | CASB_HUMAN  | 2.09 | 29             | 0.047 |
| RETIESLSSSEESITEYKQ               | CASB_HUMAN  | 2.22 | 16, 17         | 0.043 |
| RETIESLSSSEESITEYKQK              | CASB_HUMAN  | 2.35 | 16, 17, 18, 23 | 0.046 |

---

---

|                                                 |             |      |                |       |
|-------------------------------------------------|-------------|------|----------------|-------|
| RETIESLSSEESITEYKQKVE                           | CASB_HUMAN  | 2.58 | 16, 17, 18, 23 | 0.043 |
| RETIESLSSEESITEYKQKVEK                          | CASB_HUMAN  | 2.71 | 16, 17, 18, 23 | 0.039 |
| RETIESLSSEESITEYKQKVEKV                         | CASB_HUMAN  | 2.81 | 16             | 0.026 |
| RETIESLSSEESITEYKQKVEKVKHEDQQQG                 | CASB_HUMAN  | 3.76 | 16             | 0.009 |
| RETIESLSSEESITEYKQKVEKVKHEDQQQGEDEHQ            | CASB_HUMAN  | 4.39 | 17             | 0.009 |
| RETIESLSSEESITEYKQKVEKVKHEDQQQGEDEHQD           | CASB_HUMAN  | 4.51 | 16             | 0.009 |
| RETIESLSSEESITEYKQKVEKVKHEDQQQGEDEHQDK          | CASB_HUMAN  | 4.64 | 16             | 0.009 |
| RETIESLSSEESITEYKQKVEKVKHEDQQQGEDEHQDKIYPS      | CASB_HUMAN  | 5.10 | 16             | 0.010 |
| RETIESLSSEESITEYKQKVEKVKHEDQQQGEDEHQDKIYPSFQPQP | CASB_HUMAN  | 5.70 | 16             | 0.012 |
| RISHELDSASSEVN                                  | OSTP_HUMAN  | 1.55 | 16, 17, 24     | 0.080 |
| RKANDESNEHSDVIDSQELSKVS                         | OSTP_HUMAN  | 2.59 | 24             | 0.055 |
| RLQNPSSESSEPIP                                  | CASA1_HUMAN | 1.46 | 17             | 0.152 |
| RLQNPSSESSEPIPLE                                | CASA1_HUMAN | 1.70 | 16, 17, 18     | 0.150 |
| RLQNPSSESSEPIPLESREE                            | CASA1_HUMAN | 2.20 | 17             | 0.096 |

---

---

|                                 |             |      |                |       |
|---------------------------------|-------------|------|----------------|-------|
| RLQNPSSESSEPIPLESREEYMNGMN      | CASA1_HUMAN | 2.91 | 16, 17, 18, 23 | 0.593 |
| RLQNPSSESSEPIPLESREEYMNGMNR     | CASA1_HUMAN | 3.07 | 16, 17, 18     | 0.707 |
| RPDIQYP                         | OSTP_HUMAN  | 0.89 | 24             | 0.433 |
| RPDIQYPDA                       | OSTP_HUMAN  | 1.08 | 24             | 0.297 |
| RPDIQYPDATD                     | OSTP_HUMAN  | 1.30 | 16, 17, 24     | 0.156 |
| RPDIQYPDATDEDI                  | OSTP_HUMAN  | 1.65 | 24             | 0.114 |
| RPDIQYPDATDEDIT                 | OSTP_HUMAN  | 1.75 | 16, 17, 24     | 0.124 |
| RPDIQYPDATDEDITS                | OSTP_HUMAN  | 1.84 | 24             | 0.096 |
| RPDIQYPDATDEDITSH               | OSTP_HUMAN  | 1.98 | 16, 17, 18, 24 | 0.107 |
| RPDIQYPDATDEDITSHMESEELNGA      | OSTP_HUMAN  | 2.94 | 24             | 0.159 |
| RPDIQYPDATDEDITSHMESEELNGAY     | OSTP_HUMAN  | 3.10 | 16, 17, 18, 24 | 0.234 |
| RPDIQYPDATDEDITSHMESEELNGAYK    | OSTP_HUMAN  | 3.23 | 16, 17, 18, 24 | 0.254 |
| RPDIQYPDATDEDITSHMESEELNGAYKAIP | OSTP_HUMAN  | 3.51 | 24             | 0.178 |
| RPHAQIPQRQYLPNSHPP              | CASK_HUMAN  | 2.14 | 16             | 0.307 |

---

---

|                                           |             |      |                |       |
|-------------------------------------------|-------------|------|----------------|-------|
| RPKLPLRYPERLQNPSE                         | CASA1_HUMAN | 2.10 | 16, 17         | 0.242 |
| RPKLPLRYPERLQNPSESSEPIPLE                 | CASA1_HUMAN | 2.95 | 17, 18         | 0.425 |
| RPKLPLRYPERLQNPSESSEPIPLESREEYMNGM        | CASA1_HUMAN | 4.05 | 16, 17         | 0.549 |
| RPKLPLRYPERLQNPSESSEPIPLESREEYMNGMN       | CASA1_HUMAN | 4.16 | 16, 17, 18     | 0.593 |
| RPKLPLRYPERLQNPSESSEPIPLESREEYMNGMNR      | CASA1_HUMAN | 4.32 | 16, 17, 18     | 0.655 |
| RPKLPLRYPERLQNPSESSEPIPLESREEYMNGMNRQ     | CASA1_HUMAN | 4.45 | 16             | 0.632 |
| RPKLPLRYPERLQNPSESSEPIPLESREEYMNGMNRQRNIL | CASA1_HUMAN | 4.94 | 16             | 0.724 |
| RRPDIQYPDATD                              | OSTP_HUMAN  | 1.45 | 24             | 0.129 |
| RRPDIQYPDATDEDIT                          | OSTP_HUMAN  | 1.91 | 17, 24         | 0.108 |
| RRPDIQYPDATDEDITSH                        | OSTP_HUMAN  | 2.13 | 16, 17, 24     | 0.094 |
| RRPDIQYPDATDEDITSHMESEELNG                | OSTP_HUMAN  | 3.02 | 24             | 0.198 |
| RRPDIQYPDATDEDITSHMESEELNGA               | OSTP_HUMAN  | 3.10 | 24             | 0.151 |
| RRPDIQYPDATDEDITSHMESEELNGAY              | OSTP_HUMAN  | 3.26 | 17, 18, 24     | 0.227 |
| RRPDIQYPDATDEDITSHMESEELNGAYK             | OSTP_HUMAN  | 3.39 | 16, 17, 18, 24 | 0.251 |

---

---

|                                   |              |      |                |       |
|-----------------------------------|--------------|------|----------------|-------|
| RRSAASSAVSSVGARSRGLGGYHG          | PKD2_HUMAN   | 2.35 | 18             | 0.371 |
| SAGSWNSGSSGPGSTGNRNPGSSGTGGTATWKP | FIBA_HUMAN   | 3.07 | 17             | 0.271 |
| SEELNGAYK                         | OSTP_HUMAN   | 1.02 | 17             | 0.139 |
| SEESITEYK                         | CASB_HUMAN   | 1.09 | 16, 17, 23     | 0.085 |
| SEPIPLESREEYMNGMN                 | CASA1_HUMAN  | 2.00 | 17             | 0.607 |
| SGGGVPPPPPPP                      | DIAP3_HUMAN  | 1.06 | 17             | 0.815 |
| SGSSEEQGGSSRALVST                 | PIGR_HUMAN   | 1.64 | 23             | 0.307 |
| SGSSEEQGGSSRALVSTLVPLG            | PIGR_HUMAN   | 2.12 | 21             | 0.823 |
| SHELDSASSEVN                      | OSTP_HUMAN   | 1.28 | 16, 17, 18, 24 | 0.104 |
| SIQDLVREGSRGRASDFRGGSL            | C5NM88_HUMAN | 2.37 | 17             | 0.522 |
| SIQLPTTVRDIMNRW                   | MAAV_HUMAN   | 1.83 | 19             | 0.532 |
| SKEEDKHLKFRIS                     | OSTP_HUMAN   | 1.62 | 24             | 0.307 |
| SKEEDKHLKFRISHELDSASSEVN          | OSTP_HUMAN   | 2.79 | 24             | 0.107 |
| SKKFRRPDIQYPDATD                  | OSTP_HUMAN   | 1.94 | 24             | 0.121 |

---

---

|                                       |             |      |                |       |
|---------------------------------------|-------------|------|----------------|-------|
| SKKFRRPDIQYPDATDEDITSH                | OSTP_HUMAN  | 2.62 | 16             | 0.095 |
| SKKFRRPDIQYPDATDEDITSHMESEELNGAY      | OSTP_HUMAN  | 3.74 | 16             | 0.055 |
| SKKFRRPDIQYPDATDEDITSHMESEELNGAYK     | OSTP_HUMAN  | 3.87 | 16, 17         | 0.050 |
| SKLIPTQPSQG                           | BT1A1_HUMAN | 1.16 | 17             | 0.202 |
| SKLIPTQPSQGAP                         | BT1A1_HUMAN | 1.32 | 16, 17, 18     | 0.240 |
| SKSKKFRRPDIQYPDATD                    | OSTP_HUMAN  | 2.15 | 17, 24         | 0.133 |
| SKSKKFRRPDIQYPDATDEDITSH              | OSTP_HUMAN  | 2.84 | 16, 17, 24     | 0.060 |
| SKSKKFRRPDIQYPDATDEDITSHMESEELNGAY    | OSTP_HUMAN  | 3.96 | 16             | 0.038 |
| SKSKKFRRPDIQYPDATDEDITSHMESEELNGAYK   | OSTP_HUMAN  | 4.09 | 16, 17, 18     | 0.036 |
| SKSKKFRRPDIQYPDATDEDITSHMESEELNGAYKAI | OSTP_HUMAN  | 4.27 | 17             | 0.073 |
| SLNSSEPLFLGQTGLGTTEEMGKLAL            | CHSS1_HUMAN | 2.69 | 17             | 0.189 |
| SLSSSEESITEYK                         | CASB_HUMAN  | 1.46 | 16, 17, 18, 23 | 0.096 |
| SLSSSEESITEYKQKVEK                    | CASB_HUMAN  | 2.07 | 17, 23         | 0.074 |
| SPAVLVHRDGREQEAEQMPEY                 | BT1A1_HUMAN | 2.44 | 16, 17         | 0.703 |

---

---

|                                                |             |      |                |       |
|------------------------------------------------|-------------|------|----------------|-------|
| SPLENAIETMQLTNDKINSMVQQHLDDPSLPINPLSMLLNGIVDPA | DOCK1_HUMAN | 5.03 | 17             | 0.049 |
| SPTIPFFDPQIP                                   | CASB_HUMAN  | 1.36 | 16, 17, 22     | 0.682 |
| SPTIPFFDPQIPK                                  | CASB_HUMAN  | 1.49 | 16, 17, 18, 29 | 0.674 |
| SPTIPFFDPQIPK                                  | CASB_HUMAN  | 1.49 | 20             | 0.674 |
| SPTIPFFDPQIPKLT                                | CASB_HUMAN  | 1.70 | 17, 18         | 0.703 |
| SPTIPFFDPQIPKLT                                | CASB_HUMAN  | 1.70 | 20             | 0.703 |
| SPTIPFFDPQIPKLT                                | CASB_HUMAN  | 1.82 | 17             | 0.487 |
| SPYEKVSAGNGGSS                                 | MUC1_HUMAN  | 1.34 | 17             | 0.274 |
| SPYEKVSAGNGGSSL                                | MUC1_HUMAN  | 1.45 | 16, 17         | 0.464 |
| SPYEKVSAGNGGSSLS                               | MUC1_HUMAN  | 1.54 | 16, 17, 18     | 0.335 |
| SPYEKVSAGNGGSSLSY                              | MUC1_HUMAN  | 1.70 | 16             | 0.355 |
| SQPRALEQQASTPPPPP                              | INF2_HUMAN  | 1.80 | 17             | 0.464 |
| SRASVDSGSSEEQGGSSRA                            | PIGR_HUMAN  | 1.85 | 23             | 0.149 |
| SSEESITEY                                      | CASB_HUMAN  | 1.04 | 16             | 0.090 |

---



---

|                                         |             |      |                |       |
|-----------------------------------------|-------------|------|----------------|-------|
| SSEESITEYK                              | CASB_HUMAN  | 1.17 | 16, 17, 18     | 0.096 |
| SSEESITEYKQ                             | CASB_HUMAN  | 1.30 | 16             | 0.089 |
| SSEESITEYKQK                            | CASB_HUMAN  | 1.43 | 23             | 0.088 |
| SSEPIPLESREEYMNGMN                      | CASA1_HUMAN | 2.08 | 17             | 0.627 |
| SSPGTSDMKDLVGNIEQNEHSVI                 | MRC1_HUMAN  | 2.46 | 17, 18         | 0.500 |
| SSSEESITEY                              | CASB_HUMAN  | 1.13 | 17             | 0.096 |
| SSSEESITEYK                             | CASB_HUMAN  | 1.26 | 16, 17, 18, 23 | 0.110 |
| SSSEESITEYKQ                            | CASB_HUMAN  | 1.39 | 16, 17         | 0.096 |
| SSSEESITEYKQKVEK                        | CASB_HUMAN  | 1.87 | 16, 17, 23     | 0.078 |
| STAKGAVDHLKLSLESLSYFSIESSTK             | APOB_HUMAN  | 2.89 | 16             | 0.026 |
| STLFENSPTSAHAFWGGSVVSSQSTPESMLSGKSSYLPN | ANR17_HUMAN | 4.08 | 17             | 0.027 |
| SVDSGSSEEQGGSSRA                        | PIGR_HUMAN  | 1.54 | 17, 18, 23     | 0.152 |
| SVDSGSSEEQGGSSRALVSTLVPL                | PIGR_HUMAN  | 2.36 | 17, 18         | 0.817 |
| SVDSGSSEEQGGSSRALVSTLVPLG               | PIGR_HUMAN  | 2.42 | 16, 17, 18, 21 | 0.819 |

---

---

|                                  |             |      |            |       |
|----------------------------------|-------------|------|------------|-------|
| SVPQPKVLPQP                      | CASB_HUMAN  | 1.30 | 17, 18     | 0.410 |
| SVPQPKVLPQPQVVPYP                | CASB_HUMAN  | 1.99 | 17         | 0.508 |
| SVPQPKVLPQPQVVPYPQ               | CASB_HUMAN  | 2.12 | 17, 18     | 0.468 |
| SVPQPKVLPQPQVVPYPQR              | CASB_HUMAN  | 2.27 | 22         | 0.571 |
| SVPQPKVLPQPQVVPYPQRAVPVQ         | CASB_HUMAN  | 2.77 | 17, 18     | 0.120 |
| SVPQPKVLPQPQVVPYPQRAVPVQA        | CASB_HUMAN  | 2.84 | 16, 17, 18 | 0.105 |
| SVSLGELKS                        | TBC17_HUMAN | 0.92 | 17         | 0.114 |
| SYETSQLDDQSAETHSHKQSRLY          | OSTP_HUMAN  | 2.71 | 24         | 0.498 |
| TDLENLHLPLPLLQPLMQQVPQPIPQT      | CASB_HUMAN  | 3.08 | 17         | 0.400 |
| TDRSPYEKVSAGNGGSSLS              | MUC1_HUMAN  | 1.91 | 16, 17, 18 | 0.191 |
| TDRSPYEKVSAGNGGSSLSY             | MUC1_HUMAN  | 2.08 | 17, 18     | 0.206 |
| TDRSPYEKVSAGNGGSSLSYTNPAVAATSANL | MUC1_HUMAN  | 3.19 | 17, 18     | 0.194 |
| THQIYPVTQPLAPVHNPIS              | CASB_HUMAN  | 2.11 | 17         | 0.159 |
| THQIYPVTQPLAPVHNPISV             | CASB_HUMAN  | 2.21 | 16, 17, 18 | 0.195 |

---

---

|                                 |             |      |                |       |
|---------------------------------|-------------|------|----------------|-------|
| TIESLSSSEESITE                  | CASB_HUMAN  | 1.51 | 18             | 0.064 |
| TIESLSSSEESITEYK                | CASB_HUMAN  | 1.80 | 16, 17, 18, 23 | 0.067 |
| TIESLSSSEESITEYKQKVEK           | CASB_HUMAN  | 2.42 | 16, 17, 18     | 0.179 |
| TIPFFDPQIPKLTDLN                | CASB_HUMAN  | 1.99 | 19             | 0.344 |
| TKLIVQLDKKVISQ                  | NPT2B_HUMAN | 1.61 | 17             | 0.062 |
| TLALPPQPLWSVPQP                 | CASB_HUMAN  | 1.64 | 16             | 0.482 |
| TNPAVAATSANL                    | MUC1_HUMAN  | 1.13 | 16, 17, 23     | 0.143 |
| TPFSIPSHHSDTPTTLA               | MUC1_HUMAN  | 1.81 | 17             | 0.228 |
| TQLVNHFWKLHAS                   | UBR4_HUMAN  | 1.58 | 17             | 0.290 |
| TQPLAPVHNPIS                    | CASB_HUMAN  | 1.27 | 17             | 0.238 |
| TQPLAPVHNPISV                   | CASB_HUMAN  | 1.37 | 16, 17, 18, 22 | 0.271 |
| TRDQADGSRASVDSGSSEEQGGSSRA      | PIGR_HUMAN  | 2.60 | 16, 23         | 0.223 |
| TRLSHFYVKNEDLEKIGMGRPGQRR       | ACK1_HUMAN  | 3.12 | 17             | 0.452 |
| TSKGEKFPSTSESRNPDEEGLFTVAASVIIR | BT1A1_HUMAN | 3.35 | 16             | 0.054 |

---

---

|                                   |             |      |                |       |
|-----------------------------------|-------------|------|----------------|-------|
| TVSHKCLVVGLEQYEQML                | TNC18_HUMAN | 2.08 | 17             | 0.310 |
| TYYANPAVVRPHAQIPQ                 | CASK_HUMAN  | 1.93 | 16, 17         | 0.121 |
| TYYANPAVVRPHAQIPQR                | CASK_HUMAN  | 2.08 | 16, 17         | 0.167 |
| VADTRDQADGSRASVDSGSSEEQGGSS       | PIGR_HUMAN  | 2.66 | 16, 17, 18     | 0.256 |
| VADTRDQADGSRASVDSGSSEEQGGSSR      | PIGR_HUMAN  | 2.81 | 23             | 0.228 |
| VADTRDQADGSRASVDSGSSEEQGGSSRA     | PIGR_HUMAN  | 2.88 | 16, 17, 18, 23 | 0.203 |
| VADTRDQADGSRASVDSGSSEEQGGSSRALVST | PIGR_HUMAN  | 3.28 | 16, 17, 18     | 0.101 |
| VDSGSSEEQGGSSRALVSTLVPLG          | PIGR_HUMAN  | 2.33 | 21             | 0.810 |
| VEKVKHEDQQQGEDEHQDK               | CASB_HUMAN  | 2.31 | 17             | 0.035 |
| VEPIPYGFLPQNILP                   | CASB_HUMAN  | 1.70 | 19             | 0.692 |
| VEPIPYGFLPQNILPLA                 | CASB_HUMAN  | 1.88 | 19             | 0.791 |
| VEPIPYGFLPQNILPLAQP               | CASB_HUMAN  | 2.11 | 19             | 0.639 |
| VGPPGPPGPQPPGDSRLLSTDASH          | COHA1_HUMAN | 2.39 | 18             | 0.497 |
| VIGHKGERGVKGLTGPPGPPGTIV          | CO4A3_HUMAN | 2.42 | 18             | 0.175 |

---

---

|                           |             |      |                |       |
|---------------------------|-------------|------|----------------|-------|
| VKHEDQQQGEDEHQD           | CASB_HUMAN  | 1.82 | 17             | 0.036 |
| VKHEDQQQGEDEHQDK          | CASB_HUMAN  | 1.95 | 17, 23         | 0.043 |
| VKHEDQQQGEDEHQDKIYPS      | CASB_HUMAN  | 2.41 | 16, 17, 18     | 0.076 |
| VKHEDQQQGEDEHQDKIYPSFQPQP | CASB_HUMAN  | 3.01 | 23             | 0.357 |
| VKQADSGSSEEKQLYNKYPDVAVAT | OSTP_HUMAN  | 2.63 | 24             | 0.130 |
| VLKSPTIPFFDPQIPK          | CASB_HUMAN  | 1.83 | 17, 18         | 0.448 |
| VLLKDEPQQTAAQMGFAPIQP     | ANR17_HUMAN | 2.28 | 17             | 0.059 |
| VLPIPQQVVPYP              | CASB_HUMAN  | 1.35 | 16, 17, 18     | 0.277 |
| VLPIPQQVVPYPQ             | CASB_HUMAN  | 1.48 | 17, 18         | 0.228 |
| VLPIPQQVVPYPQR            | CASB_HUMAN  | 1.63 | 16, 17, 18, 22 | 0.346 |
| VLPIPQQVVPYPQRAVP         | CASB_HUMAN  | 1.90 | 17, 18         | 0.306 |
| VLPIPQQVVPYPQRAVPVQ       | CASB_HUMAN  | 2.13 | 16, 17, 18     | 0.237 |
| VLPIPQQVVPYPQRAVPVQA      | CASB_HUMAN  | 2.20 | 16, 17, 18, 22 | 0.199 |
| VLPIPQQVVPYPQRAVPVQAL     | CASB_HUMAN  | 2.31 | 16, 17, 18     | 0.109 |

---

---

|                                                     |            |      |            |       |
|-----------------------------------------------------|------------|------|------------|-------|
| VLPIPQQVVPYPQRAVPVQALL                              | CASB_HUMAN | 2.43 | 17, 19     | 0.093 |
| VLPIPQQVVPYPQRAVPVQALLL                             | CASB_HUMAN | 2.54 | 17, 19     | 0.072 |
| VLPIPQQVVPYPQRAVPVQALLLNQ                           | CASB_HUMAN | 2.78 | 19         | 0.078 |
| VLPIPQQVVPYPQRAVPVQALLLNQE                          | CASB_HUMAN | 2.91 | 17, 18     | 0.081 |
| VLPIPQQVVPYPQRAVPVQALLLNQEL                         | CASB_HUMAN | 3.03 | 17         | 0.076 |
| VLPIPQQVVPYPQRAVPVQALLLNQEELLNPTHQIYPVTQPLAPVHNPIS  | CASB_HUMAN | 5.56 | 16, 17     | 0.048 |
| VLPIPQQVVPYPQRAVPVQALLLNQEELLNPTHQIYPVTQPLAPVHNPISV | CASB_HUMAN | 5.66 | 16, 17     | 0.043 |
| VLPVPQPEIMEVPK                                      | CASB_HUMAN | 1.58 | 18         | 0.270 |
| VLPVPQPEIMEVPKAKDTVYT                               | CASB_HUMAN | 2.36 | 16         | 0.054 |
| VLPVPQPEIMEVPKAKDTVYTK                              | CASB_HUMAN | 2.48 | 17         | 0.055 |
| VLPVPQPEIMEVPKAKDTVYTKGRVMP                         | CASB_HUMAN | 3.02 | 16         | 0.055 |
| VMPVLKSPTIP                                         | CASB_HUMAN | 1.18 | 17         | 0.294 |
| VMPVLKSPTIPFFD                                      | CASB_HUMAN | 1.59 | 16, 17     | 0.566 |
| VMPVLKSPTIPFFDPQIPK                                 | CASB_HUMAN | 2.16 | 16, 17, 18 | 0.505 |

---

---

|                                 |            |      |            |       |
|---------------------------------|------------|------|------------|-------|
| VMPVLKSPTIPFFDPQIPK             | CASB_HUMAN | 2.16 | 20         | 0.505 |
| VMPVLKSPTIPFFDPQIPKLT           | CASB_HUMAN | 2.48 | 17, 18     | 0.073 |
| VMPVLKSPTIPFFDPQIPKLTDLN        | CASB_HUMAN | 2.84 | 17, 18     | 0.057 |
| VPKAKDTVYT                      | CASB_HUMAN | 1.12 | 17         | 0.120 |
| VPPRVPIPPRTRPHVQLSPAPPG         | ACK1_HUMAN | 2.56 | 17, 18     | 0.414 |
| VPQPEIMEVPK                     | CASB_HUMAN | 1.27 | 16         | 0.262 |
| VPQPEIMEVPKAKDT                 | CASB_HUMAN | 1.68 | 16         | 0.233 |
| VPQPEIMEVPKAKDTVYT              | CASB_HUMAN | 2.05 | 16         | 0.291 |
| VPQPIPQTLALPPQP                 | CASB_HUMAN | 1.60 | 16, 17     | 0.538 |
| VPQPKVLPQP                      | CASB_HUMAN | 1.22 | 17, 18     | 0.366 |
| VPQPKVLPQPQQVVP                 | CASB_HUMAN | 1.64 | 16, 17, 18 | 0.336 |
| VPQPKVLPQPQQVVPYP               | CASB_HUMAN | 1.90 | 16, 17, 18 | 0.433 |
| VPSAGPAGPAPTSAAAGRTFPASGGGYKASS | IRS2_HUMAN | 2.68 | 18         | 0.131 |
| VPVQALLLNQELLNPTHQ              | CASB_HUMAN | 2.14 | 16         | 0.330 |

---

---

|                                             |              |      |                       |       |
|---------------------------------------------|--------------|------|-----------------------|-------|
| VPVQALLLNQELLNPTHQIY                        | CASB_HUMAN   | 2.42 | 16                    | 0.126 |
| VPVQALLLNQELLNPTHQIYPVTQPLAPVHNP            | CASB_HUMAN   | 3.67 | 17                    | 0.359 |
| VPVQALLLNQELLNPTHQIYPVTQPLAPVHNPIS          | CASB_HUMAN   | 3.87 | 17, 18                | 0.262 |
| VPVQALLLNQELLNPTHQIYPVTQPLAPVHNPISV         | CASB_HUMAN   | 3.97 | 16, 17, 18            | 0.194 |
| VQALLLNQELLNPTHQIYPVTQPLAPVHNPIS            | CASB_HUMAN   | 3.67 | 17, 18                | 0.163 |
| VQALLLNQELLNPTHQIYPVTQPLAPVHNPISV           | CASB_HUMAN   | 3.77 | 16, 17                | 0.106 |
| VREDLAGAATWPWDKDAVTHLGGIVLSPAYYGMPGHTDTMIHE | PAPP2_HUMAN  | 4.68 | 17                    | 0.110 |
| VTQPLAPVHNPISV                              | CASB_HUMAN   | 1.47 | 16, 17, 18,<br>22, 26 | 0.212 |
| VVDAALVDCSVALAKPFDKFQFERLGYFSVDPDS          | B4DWJ2_HUMAN | 3.75 | 18                    | 0.064 |
| VVLPVPQPEIM                                 | CASB_HUMAN   | 1.22 | 17, 18                | 0.295 |
| VVLPVPQPEIMEVP                              | CASB_HUMAN   | 1.55 | 17                    | 0.221 |
| VVLPVPQPEIMEVPK                             | CASB_HUMAN   | 1.68 | 16, 17, 18            | 0.228 |
| VVLPVPQPEIMEVPKA                            | CASB_HUMAN   | 1.75 | 17, 22                | 0.239 |
| VVLPVPQPEIMEVPKAK                           | CASB_HUMAN   | 1.87 | 17                    | 0.260 |

---



---

|                               |            |      |            |       |
|-------------------------------|------------|------|------------|-------|
| VVLPVPQPEIMEVPAKADT           | CASB_HUMAN | 2.09 | 17         | 0.222 |
| VVLPVPQPEIMEVPAKADTVYT        | CASB_HUMAN | 2.45 | 16, 17     | 0.071 |
| VVLPVPQPEIMEVPAKADTVYTK       | CASB_HUMAN | 2.58 | 16, 17, 18 | 0.070 |
| VVLPVPQPEIMEVPAKADTVYTKG      | CASB_HUMAN | 2.64 | 16         | 0.071 |
| VVLPVPQPEIMEVPAKADTVYTKGR     | CASB_HUMAN | 2.80 | 16, 17     | 0.146 |
| VVLPVPQPEIMEVPAKADTVYTKGRVM   | CASB_HUMAN | 3.03 | 16, 17     | 0.064 |
| VVLPVPQPEIMEVPAKADTVYTKGRVMP  | CASB_HUMAN | 3.12 | 16, 17     | 0.068 |
| VVLPVPQPEIMEVPAKADTVYTKGRVMPV | CASB_HUMAN | 3.22 | 16, 17     | 0.054 |
| VVPYPQRAVPVQ                  | CASB_HUMAN | 1.35 | 17         | 0.146 |
| VVRPHAQIPQRQYLPNSHPPTVV       | CASK_HUMAN | 2.64 | 16         | 0.215 |
| WGQDVTSVPVTRPALGSTTPPAHDVTS   | MUC1_HUMAN | 2.78 | 17         | 0.171 |
| WGRLTWRKMCRKLLDMTFSS          | vWFC_HUMAN | 2.52 | 19         | 0.517 |
| WRKMCRKLLDMTFSSKTNTLVVR       | vWFC_HUMAN | 2.81 | 19         | 0.218 |
| WSVPQPKVLPVPPQVVPYPQRAVPVQ    | CASB_HUMAN | 2.95 | 17, 18     | 0.148 |

---

---

|                               |              |      |        |       |
|-------------------------------|--------------|------|--------|-------|
| WYLPSYLTVVIQLANIGPLLVTLLHHFRP | RFT2_HUMAN   | 3.38 | 17     | 0.078 |
| YAKIHFTIMFIGVNLTF             | Q7GXY8_HUMAN | 2.16 | 17     | 0.627 |
| YETSQLDDQSAETHSHKQSRLY        | OSTP_HUMAN   | 2.62 | 24     | 0.386 |
| YPDATDEDITSH                  | OSTP_HUMAN   | 1.36 | 16, 17 | 0.097 |
| YPERLQNPSE                    | CASA1_HUMAN  | 1.23 | 16, 17 | 0.116 |
| YPERLQNPSESSEPIP              | CASA1_HUMAN  | 1.84 | 23     | 0.182 |
| YPFV                          | CASB_HUMAN   | 0.52 | 28     | 0.832 |
| YPFVE                         | CASB_HUMAN   | 0.65 | 28     | 0.434 |
| YPFVEPI                       | CASB_HUMAN   | 0.86 | 28     | 0.506 |
| YPFVEPIP                      | CASB_HUMAN   | 0.96 | 28     | 0.575 |
| YPFVEPIPY                     | CASB_HUMAN   | 1.12 | 24     | 0.576 |
| YPFVEPIPY                     | CASB_HUMAN   | 1.12 | 28     | 0.576 |
| YPFVEPIPYG                    | CASB_HUMAN   | 1.18 | 28     | 0.629 |
| YPFVEPIPYGF                   | CASB_HUMAN   | 1.33 | 28     | 0.841 |

---

---

|                           |             |      |            |       |
|---------------------------|-------------|------|------------|-------|
| YPFVEPIPYGFL              | CASB_HUMAN  | 1.44 | 19, 20     | 0.882 |
| YPFVEPIPYGFLP             | CASB_HUMAN  | 1.54 | 20         | 0.831 |
| YPVTQPLAPVH               | CASB_HUMAN  | 1.22 | 16, 22     | 0.238 |
| YPVTQPLAPVHNPIS           | CASB_HUMAN  | 1.63 | 25         | 0.241 |
| YPVTQPLAPVHNPISV          | CASB_HUMAN  | 1.73 | 16, 17, 18 | 0.288 |
| YQRRPAIAINNPYVPRTY        | CASK_HUMAN  | 2.19 | 17         | 0.195 |
| YTKGRVMPVLKSPTIPFFDPQIPK  | CASB_HUMAN  | 2.76 | 17         | 0.045 |
| YTNPAVAATSANL             | MUC1_HUMAN  | 1.29 | 17, 18     | 0.120 |
| YTPEEFQKYCEDIVNTAAWGGQLEL | OTU6B_HUMAN | 2.91 | 17         | 0.572 |

---
